# Supplementary material for: MALDI Mass Spectrometry Imaging Highlights Specific Metabolome and Lipidome Profiles in Salivary Gland Tumor Tissues
Source: MDPI journal article supplement (doi:10.3390/metabo12060530), 2022-06-08
Supplement: s1 [file s1]

## Supplementary materials for the manuscript

### MALDI Mass Spectrometry Imaging highlights specific metabolome and lipidome profiles in salivary gland tumor tissues

Eduardo Sommella <sup>1,†</sup>, Emanuela Salviati <sup>1,†</sup>, Vicky Caponigro <sup>1</sup>, Manuela Grimaldi <sup>1</sup>, Simona Musella <sup>1</sup>, Alessia Bertamino <sup>1</sup>, Luigi Cacace <sup>2</sup>, Remo Palladino <sup>2</sup>, Giuseppe Di Mauro <sup>2</sup>, Federico Marini <sup>3</sup>, Anna Maria D'Ursi <sup>1</sup> and Pietro Campiglia <sup>1,\*</sup>

<sup>1</sup> Department of Pharmacy, University of Salerno, Via Giovanni Paolo II, 132, 84084 Fisciano, Italy; esommella@unisa.it (E.S.); esalviati@unisa.it (E.S.); vcaponigro@unisa.it (V.C.); magrimaldi@unisa.it (M.G.); smusella@unisa.it (S.M.); abertamino@unisa.it (A.B.); dursi@unisa.it (A.M.D.)

<sup>2</sup> U.O.C Clinical Pathology D.E.A. III Umberto I, Viale S. Francesco D'Assisi, 84014 Nocera Inferiore, Italy; cacace10luigi@gmail.com (L.C.); remo.palladino@tiscali.it (R.P.); dr.giuseppedimauro@gmail.com (G.D.M.)

<sup>3</sup> Department of Chemistry, University of Rome "La Sapienza", Piazzale Aldo Moro 5, 00185 Rome, Italy; federico.marini@uniroma1.it

\* Correspondence: pcampiglia@unisa.it; Tel.: +39-089-969242

† These authors contributed equally to this work.

#### Section S1. Polar and non-polar metabolites extraction, UHPLC-HRMS/MS conditions and data processing.

Despite FT-ICR provided ultra-high mass accuracy (average  $-0.14 \pm 1.32$  ppm), this data alone can not differentiate the large amount of isomers occurring in biological samples, and thus additional information, such as MS/MS fragmentation pattern comparison against a reference spectra, is mandatory for reliable metabolite annotations [24]. For this reason, the structural confirmation of many of the mass-matched compounds detected was performed "off tissue" by two UHPLC-HRMS/MS distinct methods for lipids and polar metabolite extracts, RP-UHPLC-TIMS- Q-TOF and HILIC-UHPLC-QExactive-Orbitrap-MS, respectively. The largest part of metabolites was annotated with MSI level 2 with accurate mass/spectral similarity/isotopic fine structure. Where MS/MS data were not available, they were tentatively assigned to chemical classes and reported with MSI level 3 [25].

Polar metabolites and lipids were extracted following the Matyash protocol [48] with slight modifications. Briefly, 5 mg of lyophilized tissues were treated with 225  $\mu$ L of ice-cold MeOH and were vortexed for 30 s. Subsequently 750  $\mu$ L of ice-cold MTBE were added and the solution was mixed in a thermomixer<sup>®</sup> (Eppendorf) for 6 min at 4°C. Subsequently 188  $\mu$ L of H<sub>2</sub>O were added and samples were vortexed for 20 s and finally centrifuged at 14 680 rpm, for 5 min at 4°C for phase separation. The two phases were recovered separately and dried under nitrogen. The non-polar extract was solubilized in 400  $\mu$ L of 5 mM CH<sub>3</sub>COONH<sub>4</sub> in MeOH/DCM (90/10 v/v), while the polar extract was solubilized in 200  $\mu$ L of 1:1 ACN/H<sub>2</sub>O + 0.1% HCOOH. A pooled Quality Control (QC) sample was prepared by pooling an aliquot of tissue extract from each sample.

The analysis of polar sample analyses was performed on a Thermo Ultimate RS 3000 coupled online to a Q-Exactive hybrid quadrupole Orbitrap mass spectrometer (Thermo Fisher Scientific, Bremen, Germany) equipped with a heated electrospray ionization probe (HESI II). The MS was calibrated by Thermo calmix Pierce™ calibration solutions in both polarities. Separation was performed in HILIC mode, with an Acquity BEH Amide (150 × 2.1 mm; 1.7 μm) protected with a VanGuard amide precolumn (5 × 2.1 mm; 1.7 μm) (Waters, Milford, MA, U.S.A). The column temperature was set at 45°C, and the flow rate was 0.350 mL/min. The mobile phase was (A): 5 mM CH<sub>3</sub>COONH<sub>4</sub> in H<sub>2</sub>O/ACN (95:5 v/v) + 0.1% CH<sub>3</sub>COOH (v/v) and (B): 5 mM CH<sub>3</sub>COONH<sub>4</sub> in H<sub>2</sub>O/ACN (5:95 v/v) + 0.1% CH<sub>3</sub>COOH (v/v). The following gradient was employed: 0 min, 99% B, 0.01-1 min, 99% B, 1.01-12 min, 99.01-20% B, 12.01-13 min, 20% B, returning to 99% in 0.1 min, 3 μL and 5 μL were injected for ESI<sup>+</sup> and ESI<sup>-</sup> analysis, respectively. Full MS (80-800 m/z) and data-dependent MS/MS were performed at a resolution of 35,000 and 15,000 FWHM respectively, normalized collision energy (NCE) values of 10, 20, and 30 were used. Source parameters: Sheath gas pressure, 50 arbitrary units; auxiliary gas flow, 13 arbitrary units; spray voltage, +3.5 kV, -2.8 kV; capillary temperature, 310°C; auxiliary gas heater temperature, 300°C. Three replicate of each sample were performed in each polarity, QC was randomly inserted in the batch to monitor system stability over time.

Lipid analysis was performed on Thermo Ultimate RS 3000 coupled online to a Trapped Ion-Mobility Time-of-Flight (timsTOF) Pro mass spectrometer ((Bruker Daltonik, Bremen, Germany) equipped with an electrospray ionization source (ESI). For the chromatographic separation, an Acquity UPLC CSH C18 column (100 × 2.1 mm; 1.7 μm) protected with a VanGuard CSH precolumn (5 × 2.1 mm; 1.7 μm) (Waters, Milford, MA, U.S.A) was employed. The column temperature was set at 55°C, a flow rate of 0.4 mL/min was used, mobile phase consisted of (A): ACN/H<sub>2</sub>O with 10 mM CH<sub>3</sub>COONH<sub>4</sub> and 0.1 % HCOOH 60:40 (v/v) and (B): IPA/ACN with 0.1 % HCOOH 90:10 (v/v). The following gradient has been used: 0 min, 40% B, 2 min, 43% B, 2.10 min, 50% B, 10 min, 60% B, 12 min, 75% B, 13 min, 99% B hold for 2 min, returning to 40% in 0.1 min.

Q-Exactive MS/MS data analysis was performed with MS-DIAL v4.48 (<http://prime.psc.riken.jp/compms/msdial/main.html>). Thermo RAW. data files were converted to ABF format using Reifycs Abf (Analysis Base File) converter, subsequently alignment of Profile Q-Exactive files was performed with MS tolerance set at 0.01 for MS and 0.025 for MS/MS with retention time tolerance of 0.1 min. Minimum peak height for detection was set to 10000 amplitude value. Lipid identification was performed with internal Lipidblast library while metabolites with internal libraries ESI POS and ESI NEG All\_Public\_MS/MS. All metabolites annotations were based on mass accuracy, isotopic pattern and spectral matching, rev.dot product, score cut off was 70%. All

reported spectral matches were manually revised for correct assignment, adducts with sodium, formate and acetate were allowed for adduct correction. The alignment was performed only on matched MS/MS metabolites blank corrected.

TimsTOF-MS data analysis was performed with MetaboScape 2021 (Bruker) employing a feature finding algorithm (T-Rex 4D) that automatically extracts buckets from raw files. At the beginning of each LC-MS run, a mixture (1:1 v/v) of 10mM sodium formate calibrant solution and ESI-L Low Concentration Tuning Mix was injected to recalibrate, respectively, the mass and mobility data. Feature detection was set to 500 and 250 counts for positive and negative modes. The minimum number of data points in the 4D-TIMS space was set to 100, and recursive feature extraction was used (75 points). Lipid annotation was performed first with a rule-based annotation, based on characteristic fragments and their intensity in acquired MS/MS spectra, and, subsequently, using the LipidBlast spectral library of MS DIAL (<http://prime.psc.riken.jp/compms/msdial/main.html>) with the following parameters: Mass accuracy: narrow 2 ppm, wide 10 ppm; mSigma: narrow 30, wide 250, MS/MS score: narrow 800, wide 150. Collision Cross-Section (CCS)%: narrow 2, wide 3.5. The spectra were processed in positive mode using  $[M+H]^+$ ,  $[M+Na]^+$ ,  $[M+K]^+$ ,  $[M+H-H_2O]^+$  and  $[M+NH_4]^+$  ions, while  $[M-H]^-$ ,  $[M+Cl]^-$ ,  $[M+CH_3COO]^-$  and  $[M-H_2O]^-$  in negative mode. CCS values were compared with those predicted by CCSbase platform (<https://ccsbase.net/predictions>), the assignment of the molecular formula was performed for the detected features using Smart Formula™ (SF). Each lipid feature was manually curated following Lipidomics Standard Initiative (LSI) guidelines (<https://lipidomics-standards-initiative.org/guidelines/lipid-species-identification/general-rules>). LipidCreator tool (<https://lifs-tools.org/lipidcreator.html>) extension in the Skyline (<https://skyline.ms/project/home/begin.view>) as used for in silico comparison of specific product ions for manual MS/MS curation.

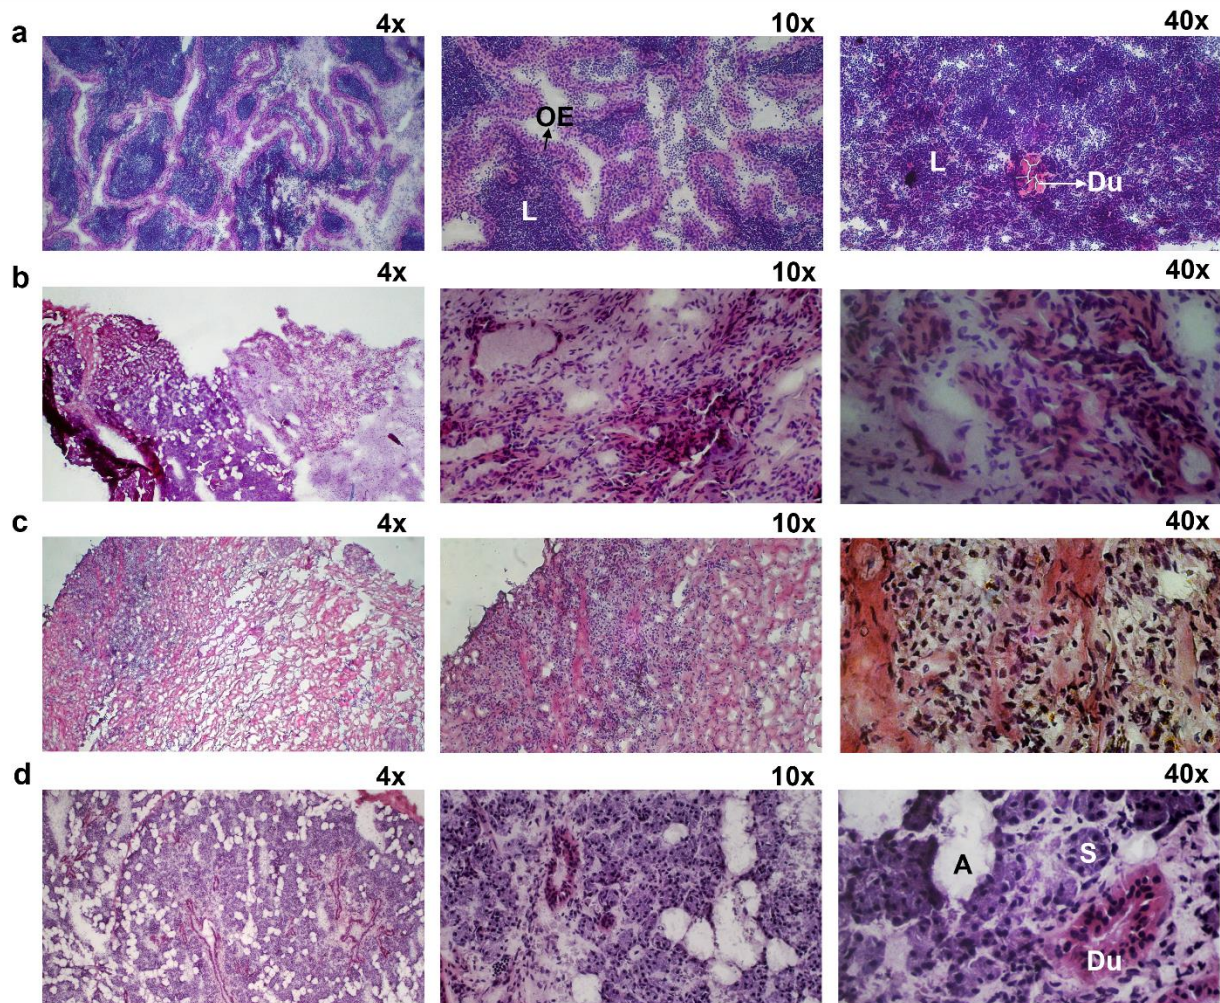

**Figure S1. Histopathology of parotid gland tumor tissues at low and high magnification.** (a) The Warthin tumor tissue shows variable proportions of papillary-cystic structures lined with a bilayer of epithelial cells consisting of oncocytic columnar cells (oncocytic epithelial cells, **OE**) with underlying discontinuous basal cells and resting on dense lymphoid stroma (**L**) with variable germinal centers.

Lymphocytes are typically small mature and have high nucleus-cytoplasm ratio with deeply stained nucleus and a relatively small amount of cytoplasm. Oncocytes show densely granular cytoplasm (stuffed with mitochondria on electron microscopy), centrally located nuclei and small nucleoli. (b) Pleomorphic adenoma consists of epithelial, myoepithelial and stromal components. The histopathologic appearance shows a tumor with a lobulated growth pattern with tubular and acinar structures formed by the epithelial component mixed with myoepithelial cells in a background of myxoid stroma. (c) The histopathological area of the chronic sialoadenitis shows various degrees of acinar destruction, fibrosis and chronic and active periductal inflammation with lymphoid aggregates and focal granulomatous reaction. (d) The normal parotid gland tissue is mainly characterized by secretory acini, serous and mucous (**S**) and intercalated ducts (**D**), which are lined by simple low cuboidal epithelium and surrounded by myoepithelial cells. The glands are divided into lobules by connective tissue sept and there are adipocytes (**A**) between acini.



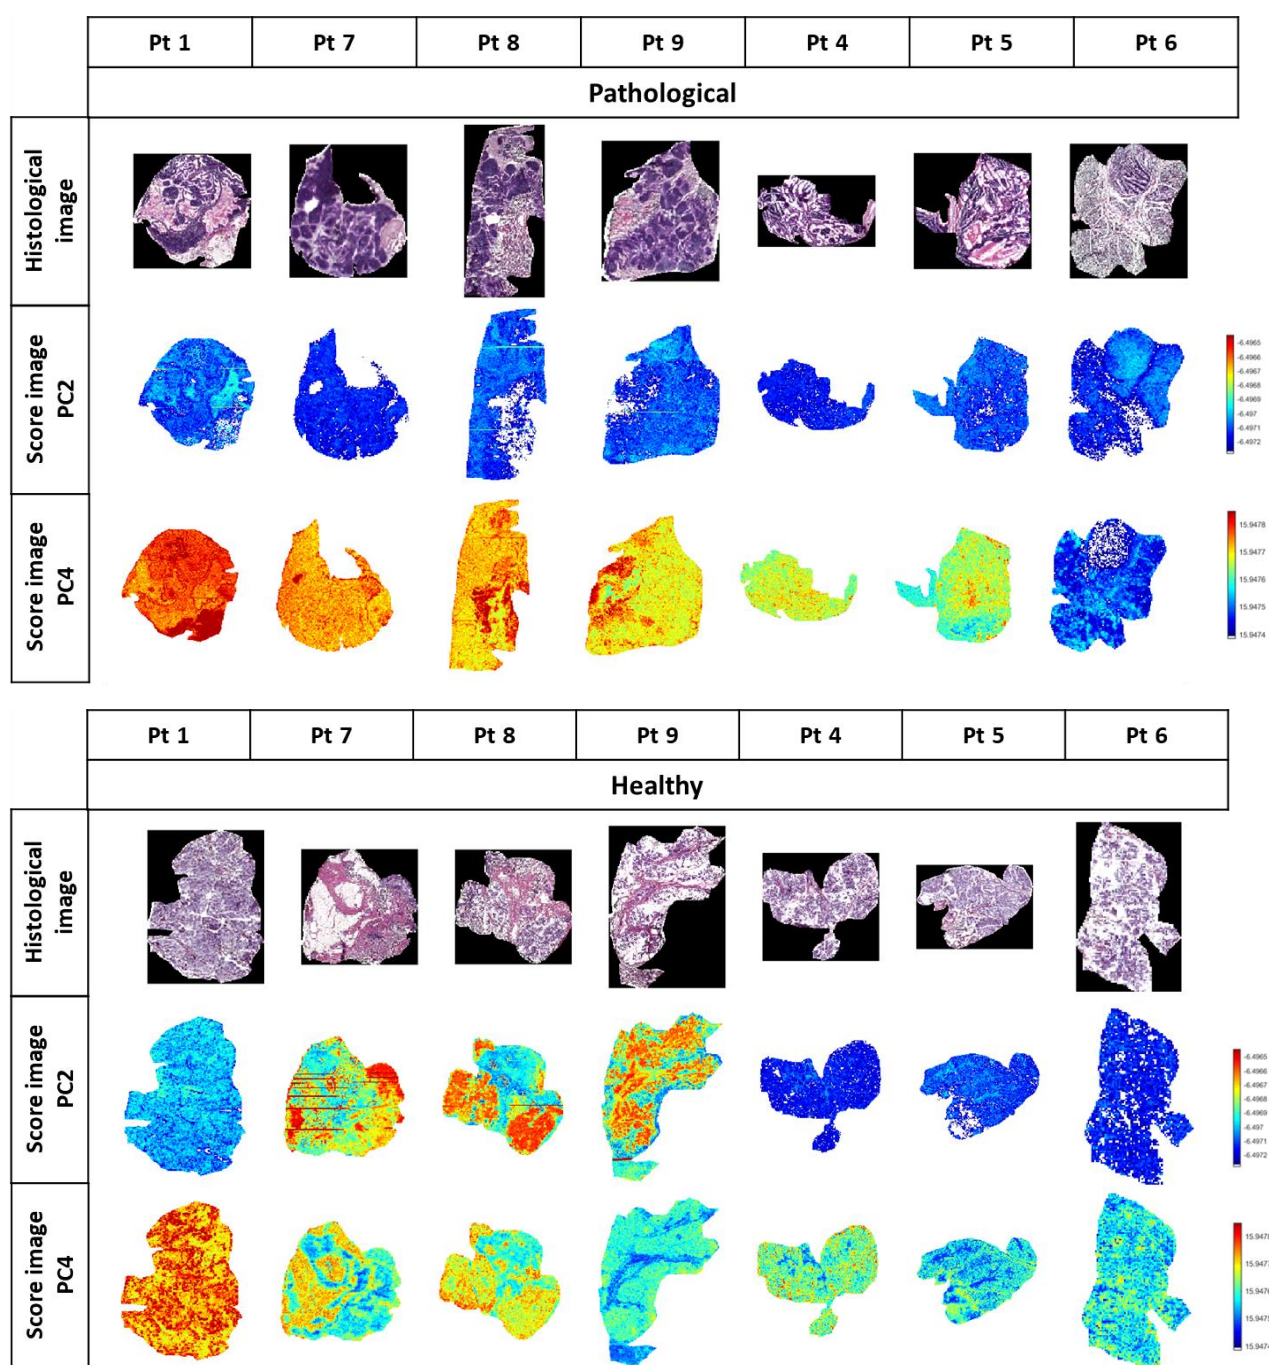

**Figure S2.** Score images for the MALDI positive TOF-MSI dataset. Loadings obtained from PCA have been applied to the entire images of the training set. PC2 and PC4 score images have been reported and compared with the histological images. Abbreviation: Pt, Patient.

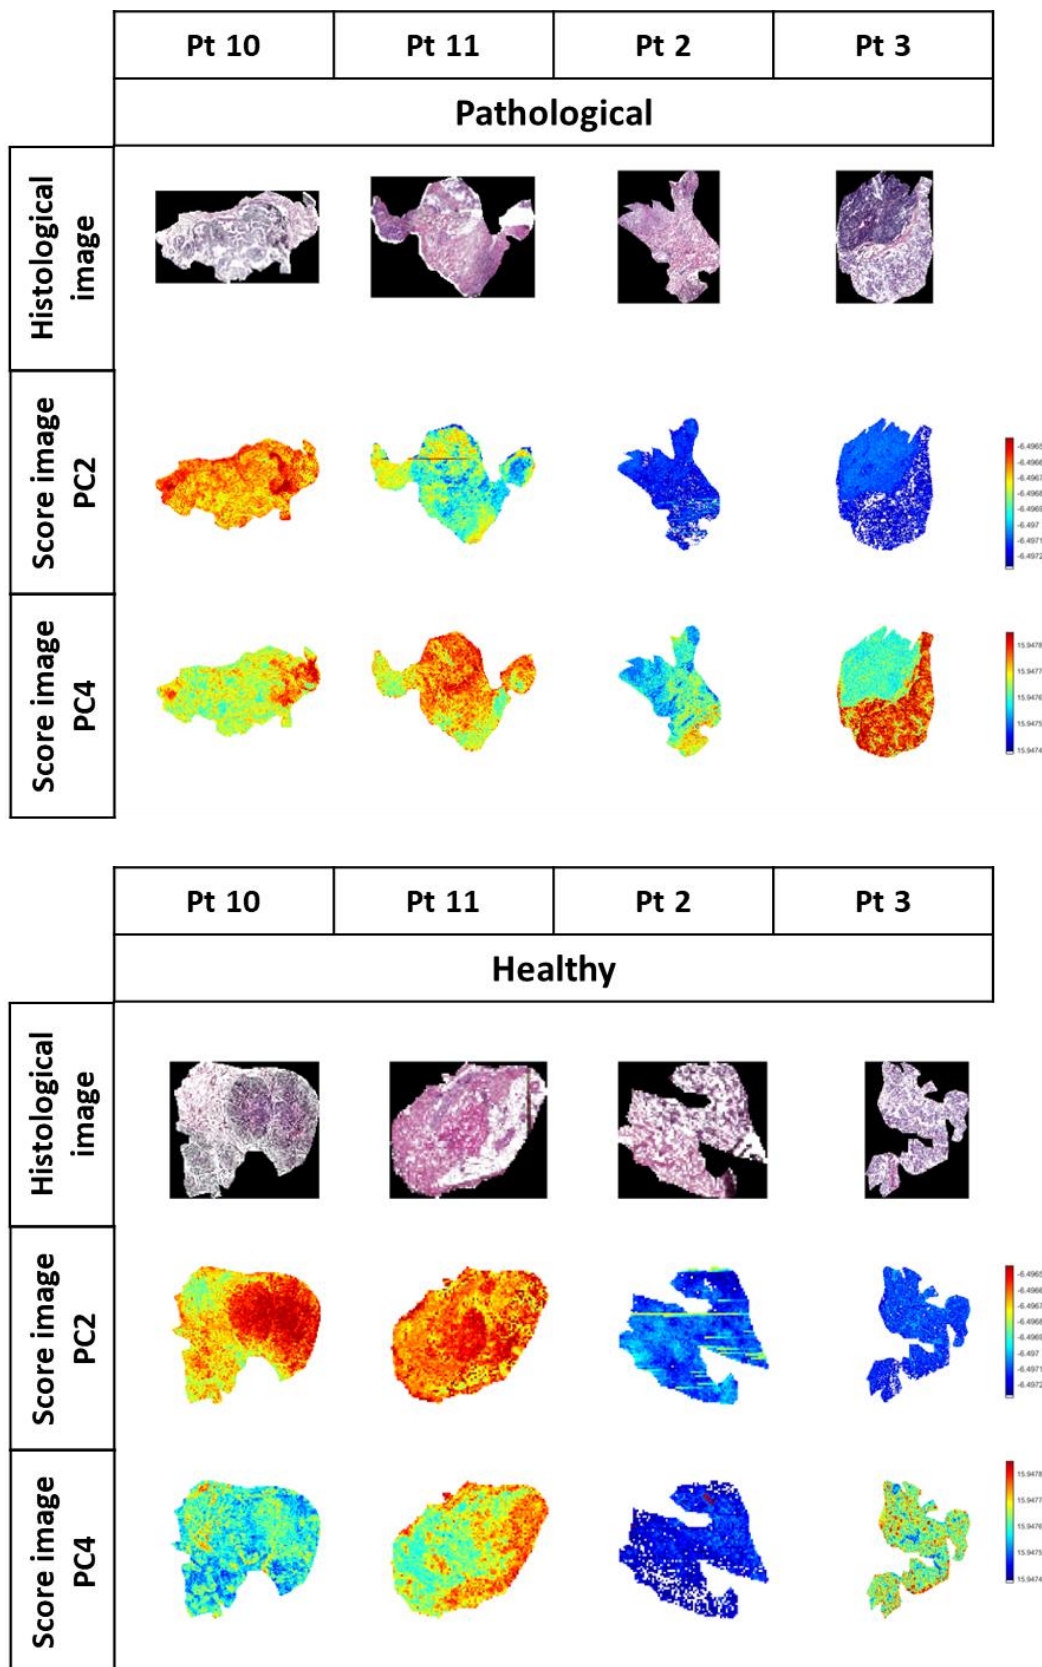

**Figure S3.** Score images for the MALDI positive TOF-MSI dataset. Loadings obtained from PCA have been applied to the entire images of the test set. PC2 and PC4 score images have been reported and compared with the histological images. Abbreviation: Pt, Patient.

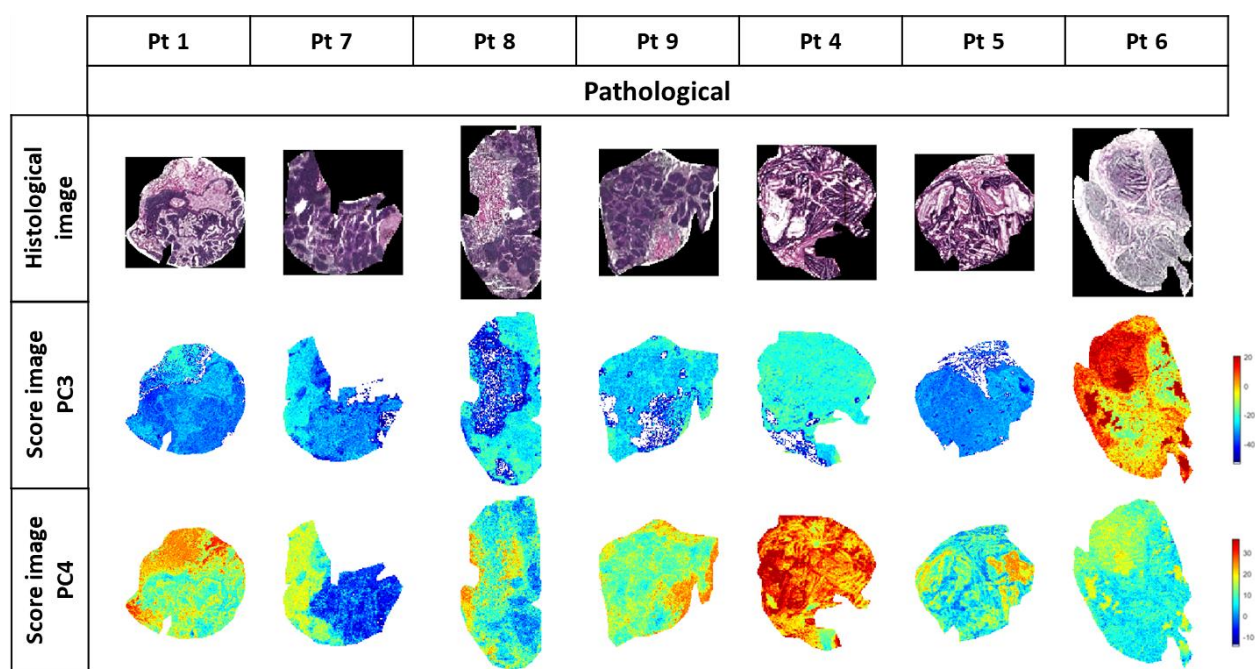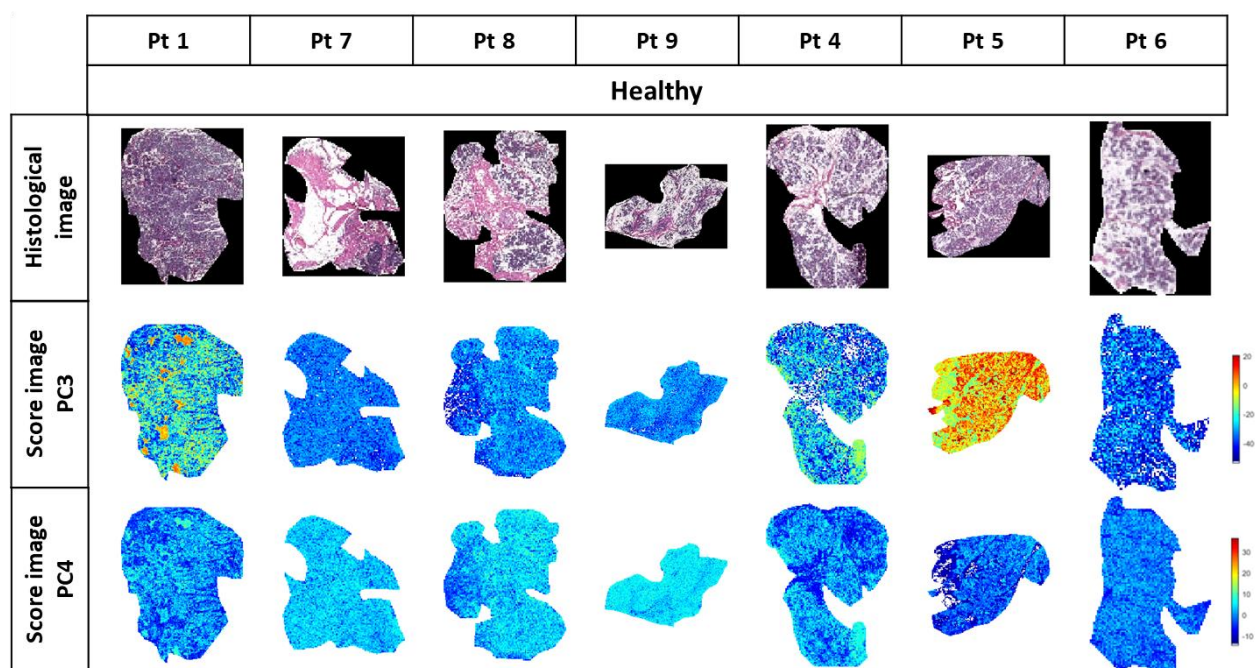

**Figure S4.** Score images for the MALDI negative TOF-MSI dataset. Loadings obtained from object level PCA have been applied to the entire images of the training set. PC3 and PC4 score images have been reported and compared with the histological images. Abbreviation: Pt, Patient.



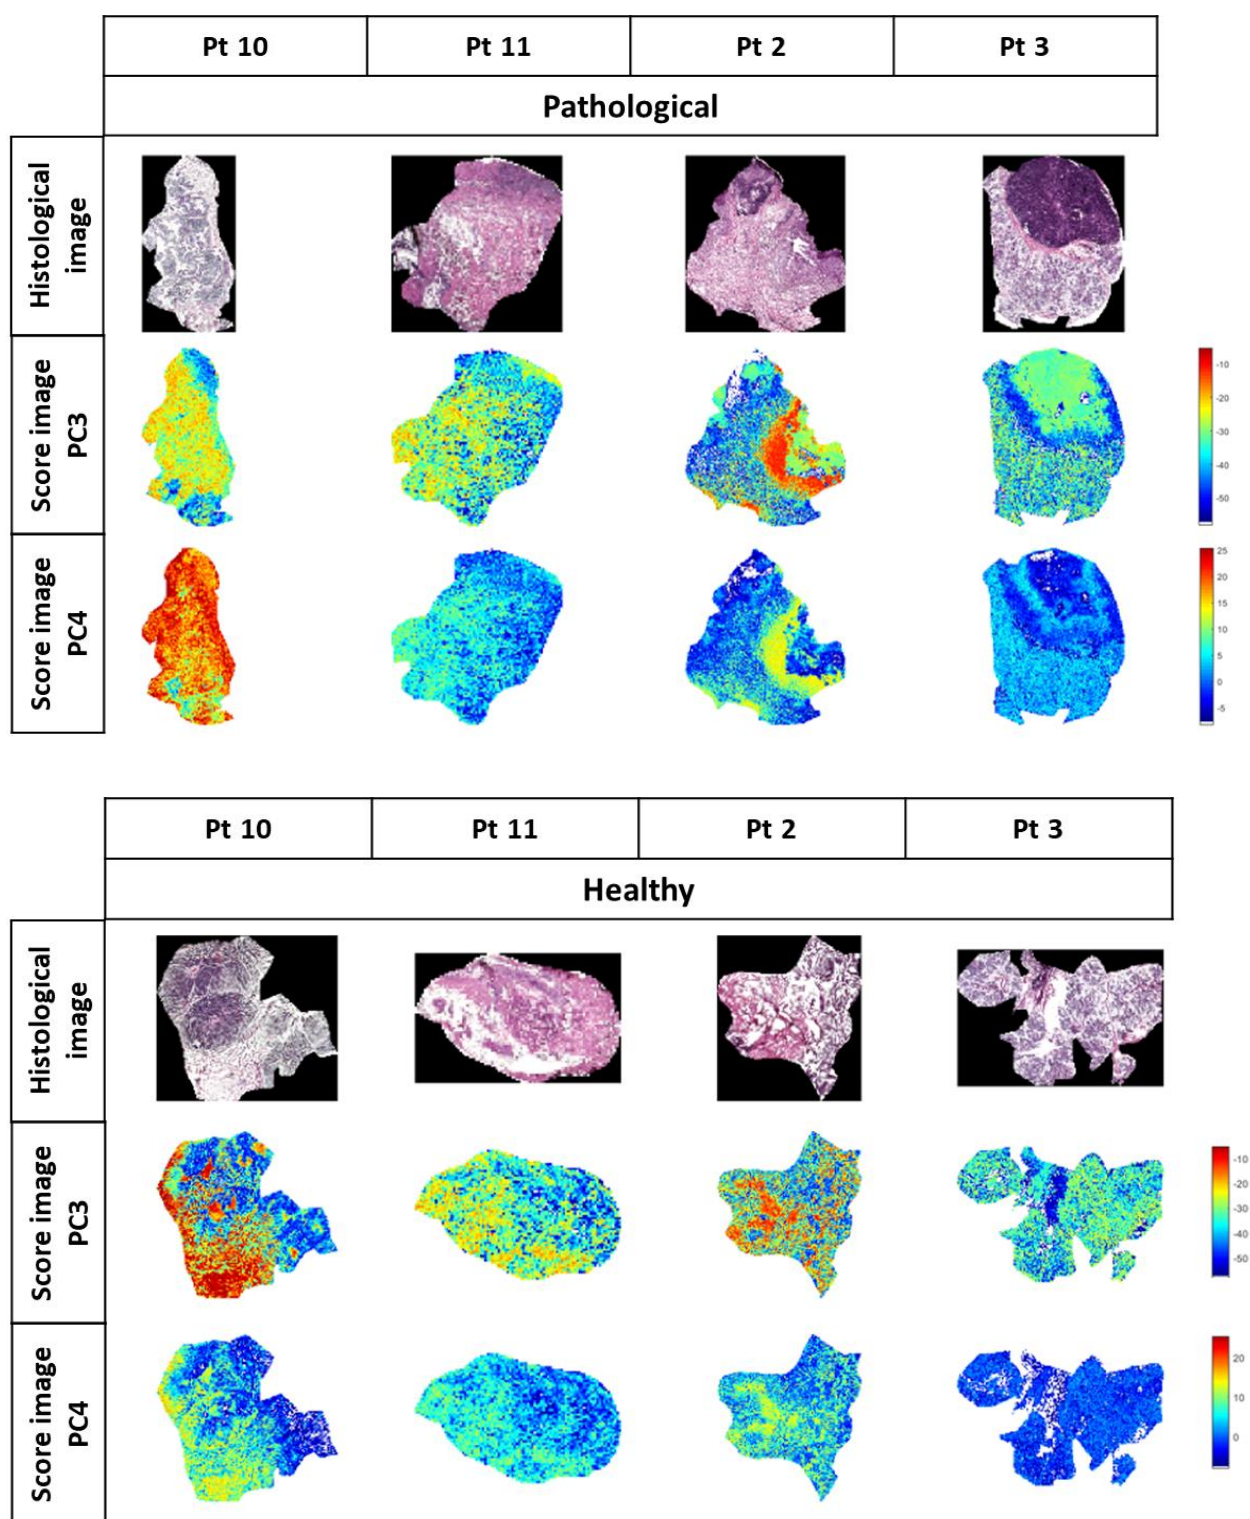

**Figure S5.** Score images for the MALDI negative TOF-MSI dataset. Loadings obtained from object level PCA have been applied to the entire images of the test set. PC3 and PC4 score images have been reported and compared with the histological images. Abbreviation: Pt, Patient.



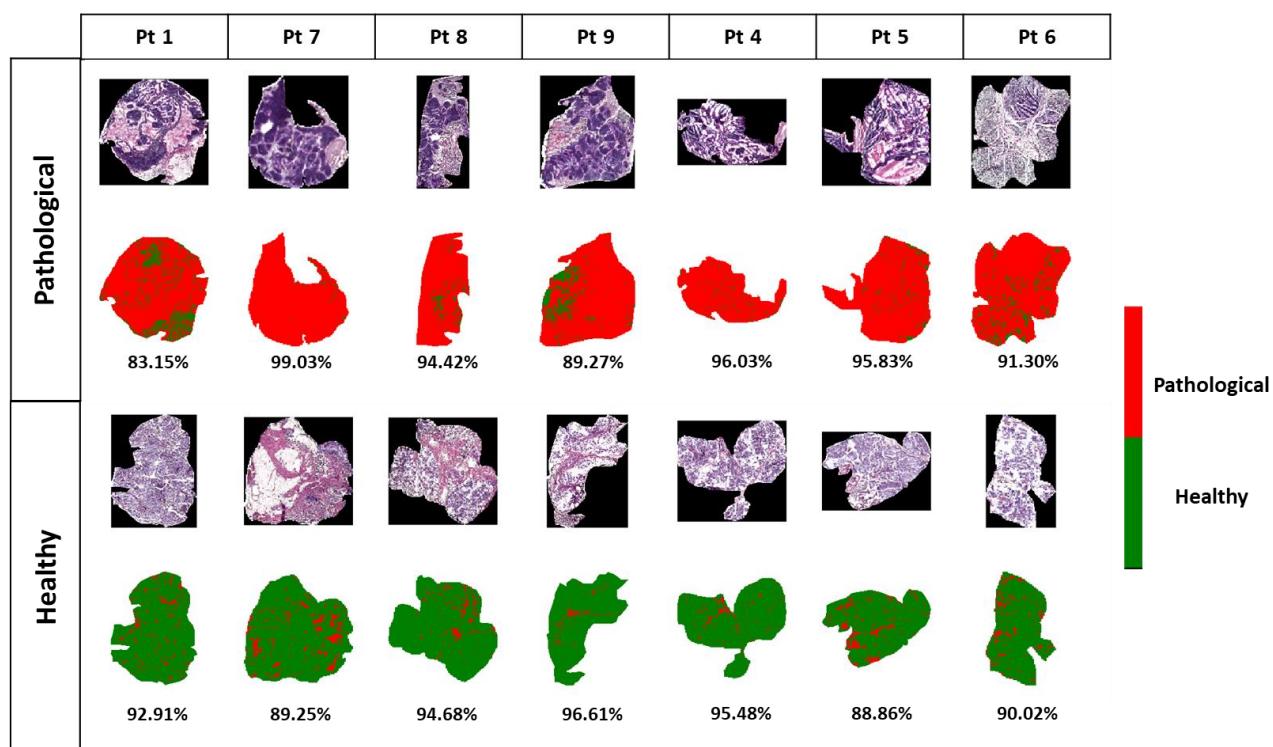

**Figure S6.** Prediction map of training set of PLS-DA analysis for the MALDI positive TOF-MSI analysis using the entire variable range. The percentage of correct classified pixels is reported for each image. Abbreviation: Pt, Patient.

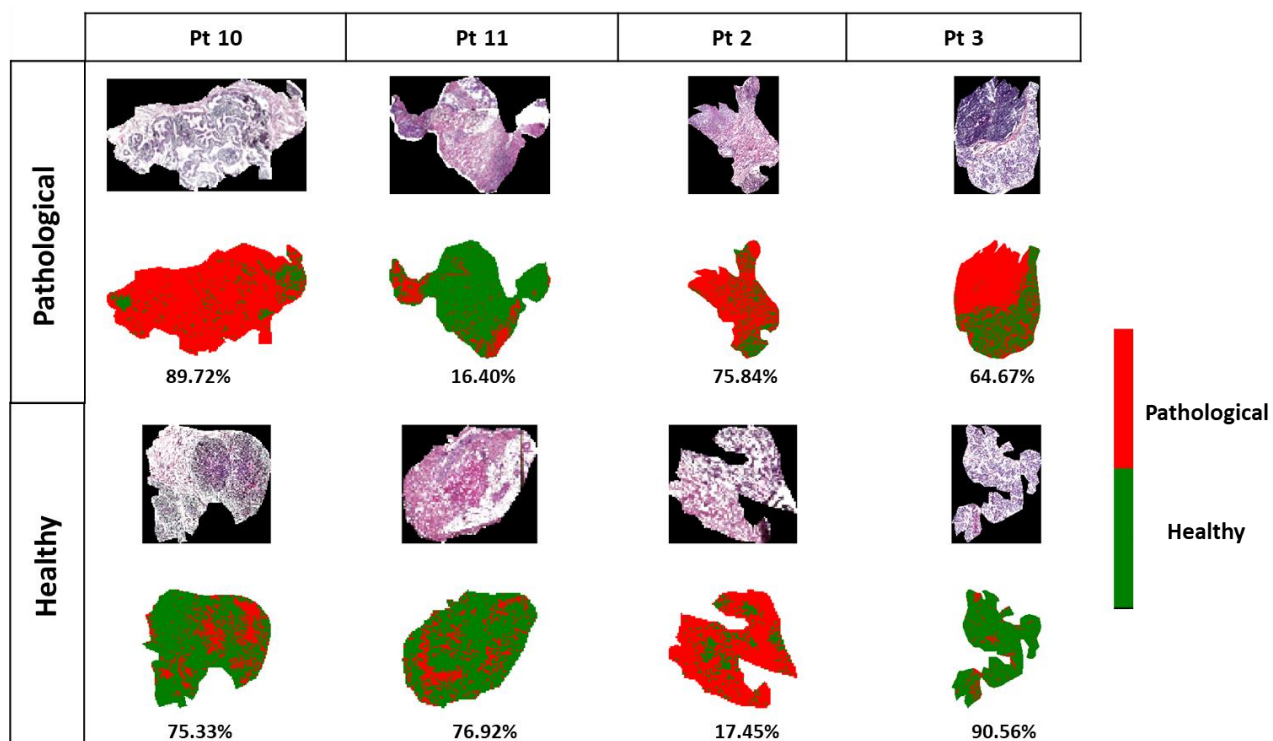

**Figure S7.** Prediction map of test set of PLS-DA analysis for the MALDI positive TOF-MSI analysis using the entire variable range. The percentage of correct classified pixels is reported for each image. Abbreviation: Pt, Patient.

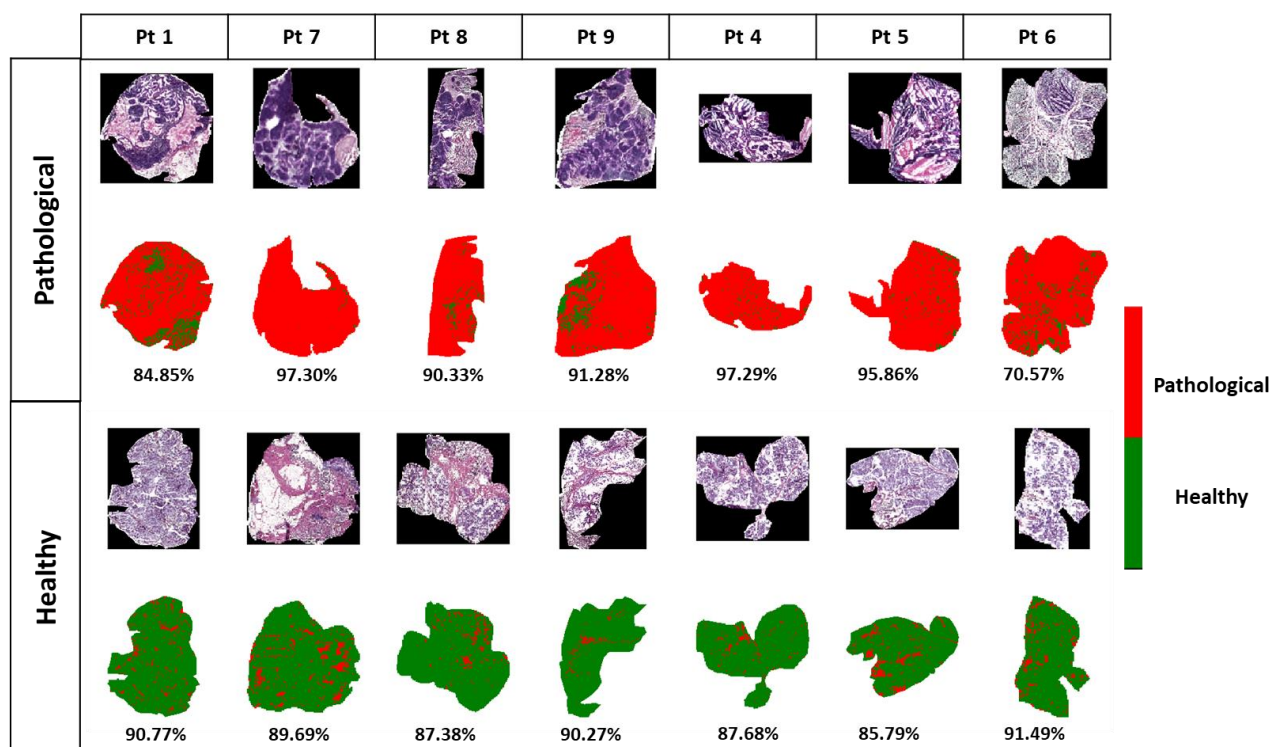

**Figure S8.** Prediction map of training set of PLS-DA analysis for the MALDI positive TOF-MSI analysis using the variable with VIP scores greater than 2. The percentage of correct classified pixels is reported for each image. Abbreviation: Pt, Patient.

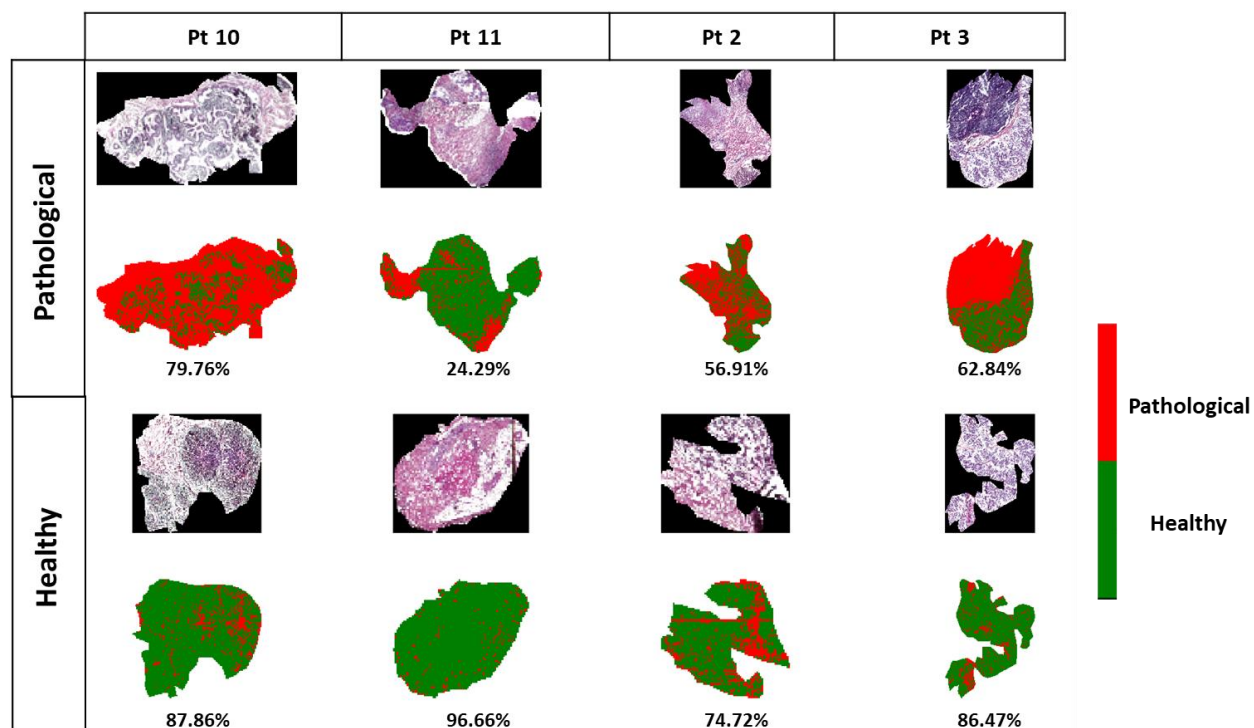

**Figure S9.** Prediction map of test set of PLS-DA analysis for the MALDI positive TOF-MSI analysis using the variable with VIP scores greater than 2. The percentage of correct classified pixels is reported for each image. Abbreviation: Pt, Patient.

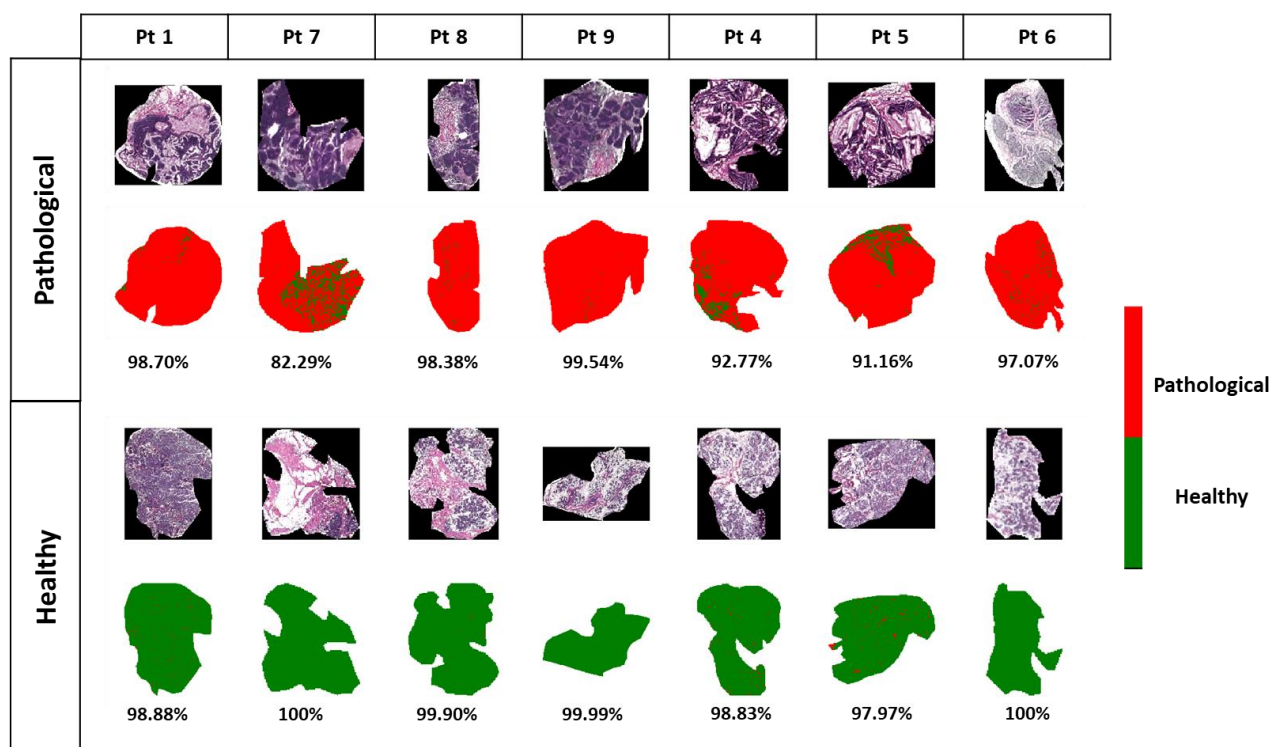

**Figure S10.** Prediction map of training set of PLS-DA analysis for the MALDI negative TOF-MSI analysis using the entire variable range. The percentage of correct classified pixels is reported for each image. Abbreviation: Pt, Patient.

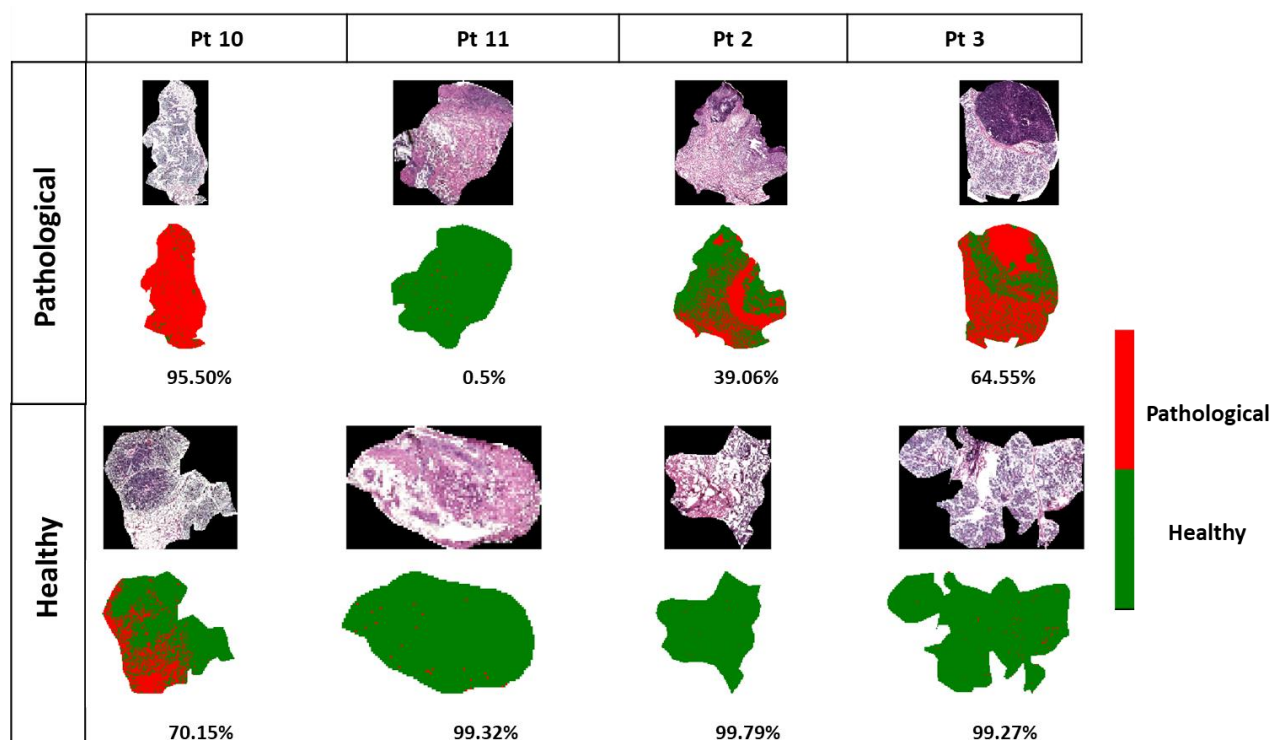

**Figure S11.** Prediction map of test set of PLS-DA analysis for the MALDI negative TOF-MSI analysis using the entire variable range. The percentage of correct classified pixels is reported for each image. Abbreviation: Pt, Patient.



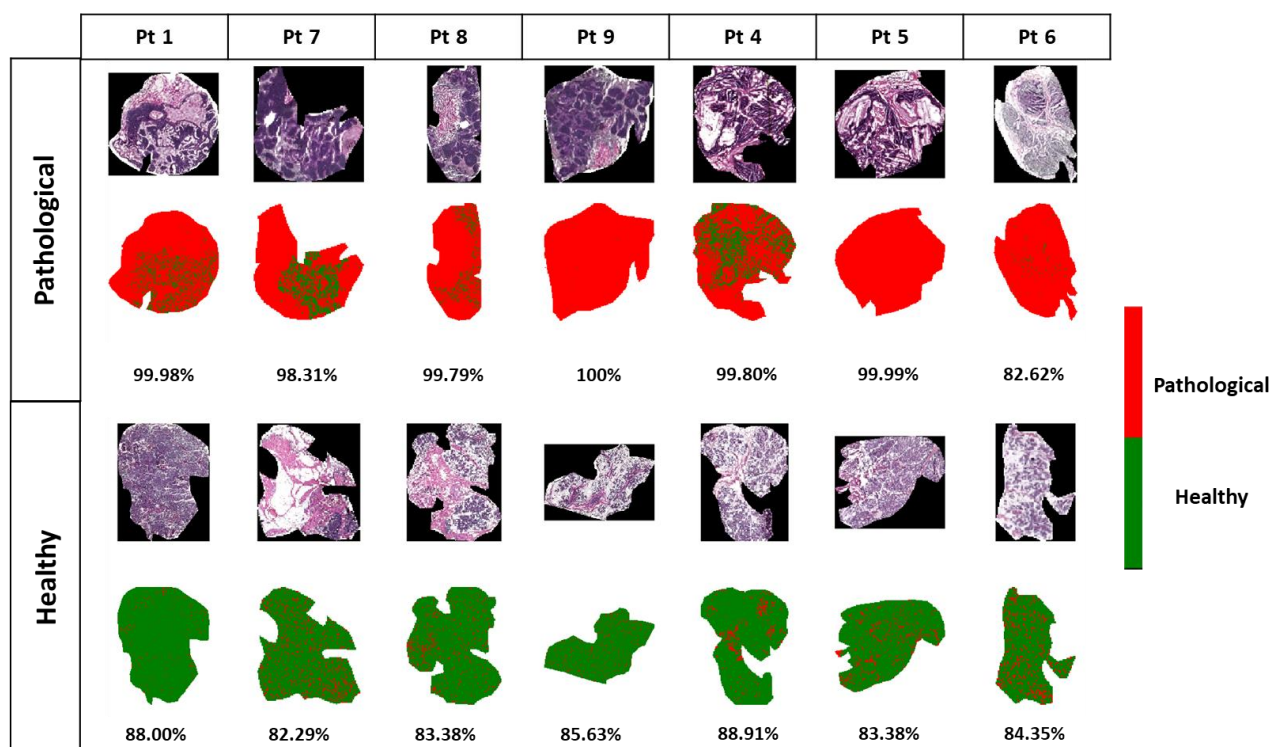

**Figure S12.** Prediction map of training set of PLS-DA analysis for the MALDI negative TOF-MSI analysis using the variable with VIP scores greater than 2. The percentage of correct classified pixels is reported for each image. Abbreviation: Pt, Patient.

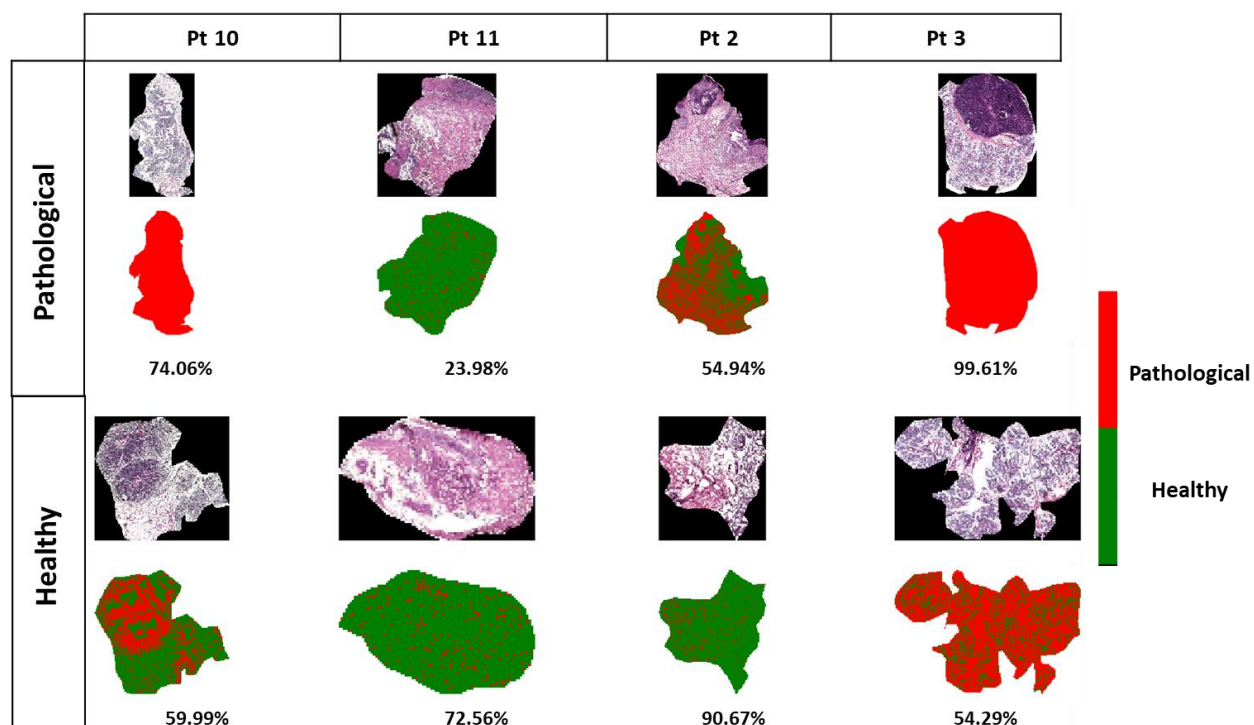

**Figure S13.** Prediction map of test set of PLS-DA analysis for the MALDI negative TOF-MSI analysis using the variable with VIP scores greater than 2. The percentage of correct classified pixels is reported for each image. Abbreviation: Pt, Patient.

**Table S1.** List of lipids and polar metabolites detected in MALDI-MSI experiments and tentatively identified by MALDI-FTICR and/or LC-HRMS/MS.

| Lipids          |                            |                         |                        |                |                                          |                                                 |                                    |
|-----------------|----------------------------|-------------------------|------------------------|----------------|------------------------------------------|-------------------------------------------------|------------------------------------|
| Compound        | Biochemical class/Subclass | RapifleX®<br><i>m/z</i> | SolariX®<br><i>m/z</i> | Error<br>(ppm) | Adduct (*)                               | Molecular<br>Formula                            | MS<br>Identification<br>Level (**) |
| FAHFA 37:4;O    | Fatty Acyls [FA]           | 575.501                 | 575.50118              | -3.832         | [M+H] <sup>+</sup> , [M+Na] <sup>+</sup> | C <sub>37</sub> H <sub>66</sub> O <sub>4</sub>  | 3                                  |
| FOH 37:4;O3     | Fatty Acyls [FA]           | 577.542                 | 577.51697              | -3.562         | [M+H] <sup>+</sup> , [M+Na] <sup>+</sup> | C <sub>37</sub> H <sub>68</sub> O <sub>4</sub>  | 3                                  |
| FA 20:1         | Fatty Acyls [FA]           | 311.314                 | 311.29443              | -0.203         | [M+H] <sup>+</sup>                       | C <sub>20</sub> H <sub>38</sub> O <sub>2</sub>  | 2                                  |
| FA 20:4         | Fatty Acyls [FA]           | 389.319                 | 389.30501              | -0.124         | [M+H] <sup>+</sup>                       | C <sub>25</sub> H <sub>40</sub> O <sub>3</sub>  | 2                                  |
| CAR 16:1        | Fatty Acyls [FA]           | 398.341                 | 398.32654              | -0.045         | [M+H] <sup>+</sup>                       | C <sub>23</sub> H <sub>43</sub> NO <sub>4</sub> | 3                                  |
| CAR 18:1        | Fatty Acyls [FA]           | 426.354                 | 426.35782              | -0.022         | [M+H] <sup>+</sup>                       | C <sub>25</sub> H <sub>47</sub> NO <sub>4</sub> | 2                                  |
| CAR 14:0        | Fatty Acyls [FA]           | 372.310                 | 372.31087              | 0.005          | [M+H] <sup>+</sup>                       | C <sub>21</sub> H <sub>41</sub> NO <sub>4</sub> | 3                                  |
| FA 19:1;O       | Fatty Acyls [FA]           | 313.207                 | 313.27372              | 0.006          | [M+H] <sup>+</sup>                       | C <sub>19</sub> H <sub>36</sub> O <sub>3</sub>  | 3                                  |
| CAR 16:0;O      | Fatty Acyls [FA]           | 416.356                 | 416.33711              | 0.023          | [M+H] <sup>+</sup>                       | C <sub>23</sub> H <sub>45</sub> NO <sub>5</sub> | 3                                  |
| FA 21:1;O       | Fatty Acyls [FA]           | 341.331                 | 341.30506              | 0.073          | [M+H] <sup>+</sup>                       | C <sub>21</sub> H <sub>40</sub> O <sub>3</sub>  | 3                                  |
| CAR 14:0;O      | Fatty Acyls [FA]           | 388.313                 | 388.30578              | 0.074          | [M+H] <sup>+</sup>                       | C <sub>21</sub> H <sub>41</sub> NO <sub>5</sub> | 3                                  |
| CAR 20:1        | Fatty Acyls [FA]           | 454.397                 | 454.38910              | 0.129          | [M+H] <sup>+</sup>                       | C <sub>27</sub> H <sub>51</sub> NO <sub>4</sub> | 3                                  |
| CAR 18:0        | Fatty Acyls [FA]           | 428.395                 | 428.37347              | 0.135          | [M+H] <sup>+</sup>                       | C <sub>25</sub> H <sub>49</sub> NO <sub>4</sub> | 3                                  |
| CAR 16:0        | Fatty Acyls [FA]           | 400.352                 | 400.34217              | 0.179          | [M+H] <sup>+</sup>                       | C <sub>23</sub> H <sub>45</sub> NO <sub>4</sub> | 2                                  |
| CAR 18:1;O      | Fatty Acyls [FA]           | 442.357                 | 442.35275              | 0.187          | [M+H] <sup>+</sup>                       | C <sub>25</sub> H <sub>47</sub> NO <sub>5</sub> | 3                                  |
| FA 20:4;O       | Fatty Acyls [FA]           | 321.253                 | 321.24251              | 0.266          | [M+H] <sup>+</sup>                       | C <sub>20</sub> H <sub>32</sub> O <sub>3</sub>  | 3                                  |
| FA 18:4         | Fatty Acyls [FA]           | 277.222                 | 277.21612              | 0.276          | [M+H] <sup>+</sup>                       | C <sub>18</sub> H <sub>28</sub> O <sub>2</sub>  | 3                                  |
| FA 18:1         | Fatty Acyls [FA]           | 283.301                 | 283.26320              | 0.310          | [M+H] <sup>+</sup>                       | C <sub>18</sub> H <sub>34</sub> O <sub>2</sub>  | 3                                  |
| FAHFA 35:4;O    | Fatty Acyls [FA]           | 547.497                 | 547.47223              | 0.446          | [M+H] <sup>+</sup>                       | C <sub>35</sub> H <sub>62</sub> O <sub>4</sub>  | 3                                  |
| FA 20:1         | Fatty Acyls [FA]           | 309.291                 | 309.28021              | 0.545          | [M-H] <sup>-</sup>                       | C <sub>20</sub> H <sub>38</sub> O <sub>2</sub>  | 2                                  |
| Citramalic acid | Fatty Acyls [FA]           | 147.045                 | 147.02996              | 0.327          | [M-H] <sup>-</sup>                       | C <sub>5</sub> H <sub>8</sub> O <sub>5</sub>    | 3                                  |
| FA 14:0         | Fatty Acyls [FA]           | 227.209                 | 227.20179              | 0.936          | [M-H] <sup>-</sup>                       | C <sub>14</sub> H <sub>28</sub> O <sub>2</sub>  | 2                                  |
| FA 15:0         | Fatty Acyls [FA]           | 241.231                 | 241.21748              | 0.322          | [M-H] <sup>-</sup>                       | C <sub>15</sub> H <sub>30</sub> O <sub>2</sub>  | 2                                  |
| CAR 3:1;O2      | Fatty Acyls [FA]           | 246.112                 | 246.09849              | 0.884          | [M-H] <sup>-</sup>                       | C <sub>11</sub> H <sub>19</sub> NO <sub>6</sub> | 3                                  |
| FA 16:1         | Fatty Acyls [FA]           | 253.214                 | 253.21752              | 1.827          | [M-H] <sup>-</sup>                       | C <sub>16</sub> H <sub>30</sub> O <sub>2</sub>  | 2                                  |
| FA 16:0         | Fatty Acyls [FA]           | 255.239                 | 255.23311              | 0.061          | [M-H] <sup>-</sup>                       | C <sub>16</sub> H <sub>32</sub> O <sub>2</sub>  | 2                                  |
| FA 14:1;O2      | Fatty Acyls [FA]           | 257.181                 | 257.17696              | 0.811          | [M-H] <sup>-</sup>                       | C <sub>14</sub> H <sub>26</sub> O <sub>4</sub>  | 3                                  |

|         |                                      |         |           |        |                                                                     |                                                 |   |
|---------|--------------------------------------|---------|-----------|--------|---------------------------------------------------------------------|-------------------------------------------------|---|
| FA 17:1 | Fatty Acyls [FA]                     | 267.231 | 267.23323 | 0.304  | <b>[M-H]<sup>-</sup></b>                                            | C <sub>17</sub> H <sub>32</sub> O <sub>2</sub>  | 3 |
| FA 17:0 | Fatty Acyls [FA]                     | 269.252 | 269.24873 | 1.001  | <b>[M-H]<sup>-</sup></b>                                            | C <sub>17</sub> H <sub>34</sub> O <sub>2</sub>  | 2 |
| FA 18:2 | Fatty Acyls [FA]                     | 279.243 | 279.23307 | 0.689  | <b>[M-H]<sup>-</sup></b>                                            | C <sub>18</sub> H <sub>32</sub> O <sub>2</sub>  | 2 |
| FA 18:1 | Fatty Acyls [FA]                     | 281.268 | 281.24875 | 0.683  | <b>[M-H]<sup>-</sup></b>                                            | C <sub>18</sub> H <sub>34</sub> O <sub>2</sub>  | 2 |
| FA 18:0 | Fatty Acyls [FA]                     | 283.269 | 283.26438 | 0.689  | <b>[M-H]<sup>-</sup></b>                                            | C <sub>18</sub> H <sub>36</sub> O <sub>2</sub>  | 2 |
| FA 20:5 | Fatty Acyls [FA]                     | 301.222 | 301.21744 | 0.358  | <b>[M-H]<sup>-</sup></b> , [M+Cl] <sup>-</sup>                      | C <sub>20</sub> H <sub>30</sub> O <sub>2</sub>  | 3 |
| FA 20:4 | Fatty Acyls [FA]                     | 303.222 | 303.23309 | -0.105 | <b>[M-H]<sup>-</sup></b> , [M+Cl] <sup>-</sup>                      | C <sub>20</sub> H <sub>32</sub> O <sub>2</sub>  | 2 |
| FA 20:2 | Fatty Acyls [FA]                     | 307.265 | 307.26454 | 0.755  | <b>[M-H]<sup>-</sup></b>                                            | C <sub>20</sub> H <sub>36</sub> O <sub>2</sub>  | 3 |
| FA 22:6 | Fatty Acyls [FA]                     | 327.201 | 327.23336 | 2.769  | <b>[M-H]<sup>-</sup></b>                                            | C <sub>22</sub> H <sub>32</sub> O <sub>2</sub>  | 2 |
| FA 22:5 | Fatty Acyls [FA]                     | 329.252 | 329.24891 | 1.269  | <b>[M-H]<sup>-</sup></b>                                            | C <sub>22</sub> H <sub>34</sub> O <sub>2</sub>  | 3 |
| FA 22:4 | Fatty Acyls [FA]                     | 331.277 | 331.26455 | 0.175  | <b>[M-H]<sup>-</sup></b>                                            | C <sub>22</sub> H <sub>36</sub> O <sub>2</sub>  | 2 |
| FA 22:3 | Fatty Acyls [FA]                     | 333.202 | 333.27987 | 1.315  | <b>[M-H]<sup>-</sup></b>                                            | C <sub>22</sub> H <sub>38</sub> O <sub>2</sub>  | 3 |
| MG 22:6 | Glycerolipids [GL]                   | 403.322 | 403.28415 | -0.327 | <b>[M+H]<sup>+</sup></b>                                            | C <sub>25</sub> H <sub>38</sub> O <sub>4</sub>  | 3 |
| DG 42:5 | Glycerolipids [GL]                   | 603.544 | 603.53473 | 0.114  | <b>[M+H]<sup>+</sup></b> , [M+Na] <sup>+</sup>                      | C <sub>39</sub> H <sub>70</sub> O <sub>4</sub>  | 3 |
| TG 50:4 | Glycerolipids [GL]/Triradylglycerols | 827.708 | 827.70934 | -2.647 | <b>[M+H]<sup>+</sup></b> , [M+K] <sup>+</sup> , [M+Na] <sup>+</sup> | C <sub>53</sub> H <sub>94</sub> O <sub>6</sub>  | 2 |
| TG 58:9 | Glycerolipids [GL]/Triradylglycerols | 929.763 | 929.75679 | -2.622 | <b>[M+H]<sup>+</sup></b>                                            | C <sub>61</sub> H <sub>100</sub> O <sub>6</sub> | 2 |
| TG 58:9 | Glycerolipids [GL]/Triradylglycerols | 933.813 | 933.78801 | -2.511 | <b>[M+H]<sup>+</sup></b>                                            | C <sub>61</sub> H <sub>104</sub> O <sub>6</sub> | 3 |
| TG 56:4 | Glycerolipids [GL]/Triradylglycerols | 911.829 | 911.80399 | -2.441 | <b>[M+H]<sup>+</sup></b>                                            | C <sub>59</sub> H <sub>106</sub> O <sub>6</sub> | 2 |
| TG 54:3 | Glycerolipids [GL]/Triradylglycerols | 801.662 | 801.69474 | -2.264 | <b>[M+H]<sup>+</sup></b> , [M+K] <sup>+</sup> , [M+Na] <sup>+</sup> | C <sub>51</sub> H <sub>92</sub> O <sub>6</sub>  | 2 |
| TG 52:4 | Glycerolipids [GL]/Triradylglycerols | 855.751 | 855.74149 | -1.856 | <b>[M+H]<sup>+</sup></b> , [M+K] <sup>+</sup> , [M+Na] <sup>+</sup> | C <sub>55</sub> H <sub>98</sub> O <sub>6</sub>  | 2 |
| TG 56:5 | Glycerolipids [GL]/Triradylglycerols | 909.795 | 909.78845 | -1.794 | <b>[M+H]<sup>+</sup></b> , [M+Na] <sup>+</sup>                      | C <sub>59</sub> H <sub>104</sub> O <sub>6</sub> | 2 |
| TG 50:3 | Glycerolipids [GL]/Triradylglycerols | 829.720 | 829.72353 | -1.539 | <b>[M+H]<sup>+</sup></b>                                            | C <sub>53</sub> H <sub>96</sub> O <sub>6</sub>  | 2 |
| TG 52:4 | Glycerolipids [GL]/Triradylglycerols | 877.731 | 877.72748 | -0.551 | <b>[M+H]<sup>+</sup></b>                                            | C <sub>57</sub> H <sub>96</sub> O <sub>6</sub>  | 3 |
| TG 46:2 | Glycerolipids [GL]/Triradylglycerols | 797.536 | 797.66288 | -0.472 | <b>[M+Na]<sup>+</sup></b> , [M+K] <sup>+</sup>                      | C <sub>49</sub> H <sub>90</sub> O <sub>6</sub>  | 2 |
| TG 50:2 | Glycerolipids [GL]/Triradylglycerols | 853.741 | 853.72563 | -0.084 | <b>[M+Na]<sup>+</sup></b> , [M+K] <sup>+</sup>                      | C <sub>53</sub> H <sub>98</sub> O <sub>6</sub>  | 2 |
| TG 56:3 | Glycerolipids [GL]/Triradylglycerols | 935.822 | 935.80391 | 0.206  | <b>[M+Na]<sup>+</sup></b> , [M+K] <sup>+</sup>                      | C <sub>59</sub> H <sub>108</sub> O <sub>6</sub> | 2 |
| TG 52:5 | Glycerolipids [GL]/Triradylglycerols | 875.718 | 875.71025 | 0.444  | <b>[M+Na]<sup>+</sup></b> , [M+K] <sup>+</sup>                      | C <sub>55</sub> H <sub>96</sub> O <sub>6</sub>  | 2 |
| TG 53:2 | Glycerolipids [GL]/Triradylglycerols | 895.774 | 895.77292 | 0.638  | <b>[M+Na]<sup>+</sup></b> , [M+K] <sup>+</sup>                      | C <sub>56</sub> H <sub>104</sub> O <sub>6</sub> | 2 |
| TG 52:2 | Glycerolipids [GL]/Triradylglycerols | 881.762 | 881.75713 | 1.124  | <b>[M+Na]<sup>+</sup></b> , [M+K] <sup>+</sup>                      | C <sub>55</sub> H <sub>102</sub> O <sub>6</sub> | 2 |
| TG 54:5 | Glycerolipids [GL]/Triradylglycerols | 911.829 | 919.71581 | 1.178  | <b>[M+K]<sup>+</sup></b> , [M+Na] <sup>+</sup>                      | C <sub>57</sub> H <sub>100</sub> O <sub>6</sub> | 2 |
| TG 54:3 | Glycerolipids [GL]/Triradylglycerols | 907.792 | 907.77289 | 1.274  | <b>[M+Na]<sup>+</sup></b> , [M+K] <sup>+</sup>                      | C <sub>57</sub> H <sub>104</sub> O <sub>6</sub> | 2 |
| TG 46:1 | Glycerolipids [GL]/Triradylglycerols | 799.704 | 799.67915 | 1.554  | <b>[M+Na]<sup>+</sup></b> , [M+K] <sup>+</sup>                      | C <sub>49</sub> H <sub>92</sub> O <sub>6</sub>  | 2 |
| TG 52:3 | Glycerolipids [GL]/Triradylglycerols | 879.771 | 879.74158 | 1.654  | <b>[M+Na]<sup>+</sup></b> , [M+K] <sup>+</sup> , [M+H] <sup>+</sup> | C <sub>55</sub> H <sub>100</sub> O <sub>6</sub> | 2 |



|            |                                                  |         |           |        |                                                                |                                                                |   |
|------------|--------------------------------------------------|---------|-----------|--------|----------------------------------------------------------------|----------------------------------------------------------------|---|
| TG 51:2    | Glycerolipids [GL]/Triradylglycerols             | 867.731 | 867.74179 | 1.894  | [M+Na] <sup>+</sup> , [M+K] <sup>+</sup>                       | C <sub>54</sub> H <sub>100</sub> O <sub>6</sub>                | 2 |
| TG 54:4    | Glycerolipids [GL]/Triradylglycerols             | 883.794 | 883.77561 | 0.171  | [M+H] <sup>+</sup> , [M+Na] <sup>+</sup>                       | C <sub>57</sub> H <sub>102</sub> O <sub>6</sub>                | 3 |
| TG 48:2    | Glycerolipids [GL]/Triradylglycerols             | 825.579 | 825.69452 | 0.314  | [M+Na] <sup>+</sup>                                            | C <sub>51</sub> H <sub>94</sub> O <sub>6</sub>                 | 2 |
| CPA 18:1   | Glycerophospholipids [GP]                        | 419.284 | 419.25573 | 0.062  | [M+H] <sup>+</sup>                                             | C <sub>21</sub> H <sub>39</sub> O <sub>6</sub> P               | 3 |
| CL 36:4    | Glycerophospholipids [GP]                        | 911.828 | 925.52082 | 0.615  | [M+H] <sup>+</sup> , [M+K] <sup>+</sup> , [M+Na] <sup>+</sup>  | C <sub>45</sub> H <sub>82</sub> O <sub>15</sub> P <sub>2</sub> | 3 |
| LPG 18:2   | Glycerophospholipids [GP]                        | 507.294 | 507.27355 | 1.394  | [M-H] <sup>-</sup>                                             | C <sub>24</sub> H <sub>45</sub> O <sub>9</sub> P               | 3 |
| PA O-31:0  | Glycerophospholipids [GP]/Glycerophosphates      | 621.411 | 621.48541 | -3.591 | [M+H] <sup>+</sup>                                             | C <sub>34</sub> H <sub>69</sub> O <sub>7</sub> P               | 3 |
| PA O-36:4  | Glycerophospholipids [GP]/Glycerophosphates      | 683.472 | 683.49862 | -3.488 | [M+H] <sup>+</sup>                                             | C <sub>39</sub> H <sub>71</sub> O <sub>7</sub> P               | 3 |
| PA 42:10   | Glycerophospholipids [GP]/Glycerophosphates      | 769.552 | 769.47829 | -2.606 | [M+H] <sup>+</sup>                                             | C <sub>45</sub> H <sub>69</sub> O <sub>8</sub> P               | 3 |
| PA 36:3    | Glycerophospholipids [GP]/Glycerophosphates      | 721.572 | 721.47782 | -0.064 | [M+Na] <sup>+</sup> , [M+K] <sup>+</sup>                       | C <sub>39</sub> H <sub>71</sub> O <sub>8</sub> P               | 3 |
| PA O-40:6  | Glycerophospholipids [GP]/Glycerophosphates      | 757.454 | 757.51427 | -0.035 | [M+Na] <sup>+</sup> , [M+K] <sup>+</sup>                       | C <sub>43</sub> H <sub>75</sub> O <sub>7</sub> P               | 3 |
| PA 38:4    | Glycerophospholipids [GP]/Glycerophosphates      | 747.603 | 747.47255 | -0.033 | [M+K] <sup>+</sup> , [M+H] <sup>+</sup> , [M+Na] <sup>+</sup>  | C <sub>41</sub> H <sub>73</sub> O <sub>7</sub> P               | 3 |
| PA O-42:6  | Glycerophospholipids [GP]/Glycerophosphates      | 785.585 | 785.54559 | 0.029  | [M+Na] <sup>+</sup> , [M+K] <sup>+</sup>                       | C <sub>45</sub> H <sub>79</sub> O <sub>7</sub> P               | 3 |
| PA O-33:0  | Glycerophospholipids [GP]/Glycerophosphates      | 649.454 | 649.51666 | 0.048  | [M+H] <sup>+</sup>                                             | C <sub>36</sub> H <sub>73</sub> O <sub>7</sub> P               | 3 |
| PA 42:9    | Glycerolipids [GL]                               | 771.534 | 771.49362 | -3.111 | [M+H] <sup>+</sup>                                             | C <sub>45</sub> H <sub>71</sub> O <sub>8</sub> P               | 3 |
| PA 40:5    | Glycerolipids [GL]                               | 789.508 | 789.48313 | -0.006 | [M+K] <sup>+</sup> , [M+Na] <sup>+</sup> , [M+H] <sup>+</sup>  | C <sub>43</sub> H <sub>75</sub> O <sub>8</sub> P               | 3 |
| LPA 20:1   | Glycerophospholipids [GP]/Glycerophosphates      | 487.291 | 487.27956 | 0.051  | [M+Na] <sup>+</sup> , [M+K] <sup>+</sup>                       | C <sub>23</sub> H <sub>45</sub> O <sub>7</sub> P               | 3 |
| LPA O-20:4 | Glycerophospholipids [GP]/Glycerophosphates      | 445.286 | 445.27138 | 0.052  | [M+H] <sup>+</sup>                                             | C <sub>23</sub> H <sub>41</sub> O <sub>6</sub> P               | 3 |
| PA 32:1    | Glycerophospholipids [GP]/Glycerophosphates      | 669.421 | 669.44662 | 0.053  | [M+Na] <sup>+</sup> , [M+K] <sup>+</sup>                       | C <sub>35</sub> H <sub>67</sub> O <sub>8</sub> P               | 3 |
| PA 34:2    | Glycerophospholipids [GP]/Glycerophosphates      | 695.487 | 695.46228 | 0.109  | [M+Na] <sup>+</sup> , [M+K] <sup>+</sup>                       | C <sub>37</sub> H <sub>69</sub> O <sub>8</sub> P               | 3 |
| LPA 18:1   | Glycerophospholipids [GP]/Glycerophosphates      | 459.307 | 459.24825 | 0.115  | [M+Na] <sup>+</sup> , [M+K] <sup>+</sup>                       | C <sub>21</sub> H <sub>41</sub> O <sub>7</sub> P               | 3 |
| PA 38:3    | Glycerophospholipids [GP]/Glycerophosphates      | 765.529 | 765.48318 | 0.201  | [M+K] <sup>+</sup> , [M+Na] <sup>+</sup>                       | C <sub>41</sub> H <sub>75</sub> O <sub>8</sub> P               | 3 |
| LPA 18:2   | Glycerophospholipids [GP]/Glycerophosphates      | 433.236 | 433.23645 | 1.282  | [M-H] <sup>-</sup>                                             | C <sub>21</sub> H <sub>39</sub> O <sub>7</sub> P               | 2 |
| LPA 18:0   | Glycerophospholipids [GP]/Glycerophosphates      | 437.268 | 437.26651 | -1.941 | [M-H] <sup>-</sup>                                             | C <sub>21</sub> H <sub>43</sub> O <sub>7</sub> P               | 2 |
| PA 36:3    | Glycerophospholipids [GP]/Glycerophosphates      | 697.482 | 697.48139 | 0.045  | [M-H] <sup>-</sup>                                             | C <sub>39</sub> H <sub>71</sub> O <sub>8</sub> P               | 3 |
| PA 38:4    | Glycerophospholipids [GP]/Glycerophosphates      | 723.551 | 723.49641 | -0.844 | [M-H] <sup>-</sup> , [M+Cl] <sup>-</sup>                       | C <sub>41</sub> H <sub>73</sub> O <sub>8</sub> P               | 3 |
| PA 24:0    | Glycerophospholipids [GP]/Glycerophosphates      | 644.395 | 644.42671 | 0.831  | [M+Na] <sup>+</sup>                                            | C <sub>32</sub> H <sub>64</sub> NO <sub>8</sub> P              | 3 |
| PC 36:2    | Glycerophospholipids [GP]/Glycerophosphocholines | 786.651 | 786.59519 | -4.899 | [M+H] <sup>+</sup> , [M+K] <sup>+</sup> , [M+Na] <sup>+</sup>  | C <sub>44</sub> H <sub>84</sub> NO <sub>8</sub> P              | 3 |
| PC O-38:4  | Glycerophospholipids [GP]/Glycerophosphocholines | 796.648 | 796.61821 | -4.435 | [M+H] <sup>+</sup> , [M+Na] <sup>+</sup> , [M+K] <sup>+</sup>  | C <sub>46</sub> H <sub>86</sub> NO <sub>7</sub> P              | 2 |
| LPC 20:4   | Glycerophospholipids [GP]/Glycerophosphocholines | 544.362 | 544.33728 | -4.349 | [[M+H] <sup>+</sup> , [M+Na] <sup>+</sup> , [M+K] <sup>+</sup> | C <sub>28</sub> H <sub>50</sub> NO <sub>7</sub> P              | 3 |
| PC O-36:5  | Glycerophospholipids [GP]/Glycerophosphocholines | 766.598 | 766.57285 | -3.829 | [M+H] <sup>+</sup>                                             | C <sub>44</sub> H <sub>80</sub> NO <sub>7</sub> P              | 2 |
| PC 36:6    | Glycerophospholipids [GP]/Glycerophosphocholines | 778.515 | 778.53554 | -3.823 | [M+H] <sup>+</sup>                                             | C <sub>44</sub> H <sub>76</sub> NO <sub>8</sub> P              | 3 |
| PC 36:3    | Glycerophospholipids [GP]/Glycerophosphocholines | 784.605 | 784.58088 | -3.686 | [M+H] <sup>+</sup> , [M+Na] <sup>+</sup> , [M+K] <sup>+</sup>  | C <sub>44</sub> H <sub>82</sub> NO <sub>8</sub> P              | 2 |

|            |                                                  |         |           |        |                                                                 |                                                   |   |
|------------|--------------------------------------------------|---------|-----------|--------|-----------------------------------------------------------------|---------------------------------------------------|---|
| PC O-36:5  | Glycerophospholipids [GP]/Glycerophosphocholines | 681.462 | 681.48301 | -3.469 | <b>[M+H]<sup>+</sup></b>                                        | C <sub>39</sub> H <sub>69</sub> O <sub>7</sub> P  | 3 |
| LPC 18:1   | Glycerophospholipids [GP]/Glycerophosphocholines | 522.374 | 522.35365 | -3.357 | <b>[M+H]<sup>+</sup>, [M+K]<sup>+</sup>, [M+Na]<sup>+</sup></b> | C <sub>26</sub> H <sub>52</sub> NO <sub>7</sub> P | 2 |
| PC 38:7    | Glycerophospholipids [GP]/Glycerophosphocholines | 804.546 | 804.55139 | -3.124 | <b>[M+H]<sup>+</sup></b>                                        | C <sub>46</sub> H <sub>78</sub> NO <sub>8</sub> P | 3 |
| LPC 22:6   | Glycerophospholipids [GP]/Glycerophosphocholines | 801.491 | 801.46549 | -2.866 | <b>[M+Na]<sup>+</sup>, [M+K]<sup>+</sup></b>                    | C <sub>43</sub> H <sub>71</sub> O <sub>10</sub> P | 3 |
| PC O-40:9  | Glycerophospholipids [GP]/Glycerophosphocholines | 814.561 | 814.57262 | -2.654 | <b>[M+H]<sup>+</sup></b>                                        | C <sub>48</sub> H <sub>80</sub> NO <sub>7</sub> P | 3 |
| PC 40:9    | Glycerophospholipids [GP]/Glycerophosphocholines | 828.566 | 828.55158 | -2.626 | <b>[M+H]<sup>+</sup></b>                                        | C <sub>48</sub> H <sub>78</sub> NO <sub>8</sub> P | 3 |
| PC 38:3    | Glycerophospholipids [GP]/Glycerophosphocholines | 812.622 | 812.54135 | -2.596 | <b>[M+H]<sup>+</sup>, [M+K]<sup>+</sup>, [M+Na]<sup>+</sup></b> | C <sub>46</sub> H <sub>86</sub> NO <sub>8</sub> P | 2 |
| PC 40:8    | Glycerophospholipids [GP]/Glycerophosphocholines | 830.578 | 830.56729 | -2.331 | <b>[M+H]<sup>+</sup>, [M+K]<sup>+</sup>, [M+Na]<sup>+</sup></b> | C <sub>48</sub> H <sub>80</sub> NO <sub>8</sub> P | 2 |
| PC 42:9    | Glycerophospholipids [GP]/Glycerophosphocholines | 856.579 | 856.58310 | -2.067 | <b>[M+H]<sup>+</sup></b>                                        | C <sub>50</sub> H <sub>82</sub> NO <sub>8</sub> P | 3 |
| PC O-30:0  | Glycerophospholipids [GP]/Glycerophosphocholines | 703.561 | 703.52583 | -1.534 | <b>[M+H]<sup>+</sup></b>                                        | C <sub>39</sub> H <sub>75</sub> O <sub>8</sub> P  | 3 |
| PC 36:4    | Glycerophospholipids [GP]/Glycerophosphocholines | 782.597 | 782.57031 | -1.324 | <b>[M+H]<sup>+</sup></b>                                        | C <sub>44</sub> H <sub>80</sub> NO <sub>8</sub> P | 2 |
| PC 34:0    | Glycerophospholipids [GP]/Glycerophosphocholines | 762.601 | 762.60065 | -0.685 | <b>[M+H]<sup>+</sup></b>                                        | C <sub>42</sub> H <sub>84</sub> NO <sub>8</sub> P | 2 |
| PC O-34:1  | Glycerophospholipids [GP]/Glycerophosphocholines | 746.686 | 746.60573 | -0.614 | <b>[M+H]<sup>+</sup>, [M+K]<sup>+</sup>, [M+Na]<sup>+</sup></b> | C <sub>42</sub> H <sub>84</sub> NO <sub>7</sub> P | 2 |
| PC 32:2    | Glycerophospholipids [GP]/Glycerophosphocholines | 730.535 | 730.53785 | -0.508 | <b>[M+H]<sup>+</sup></b>                                        | C <sub>40</sub> H <sub>76</sub> NO <sub>8</sub> P | 2 |
| PC 32:1    | Glycerophospholipids [GP]/Glycerophosphocholines | 770.558 | 770.50966 | -0.402 | <b>[M+K]<sup>+</sup>, [M+Na]<sup>+</sup>, [M+H]<sup>+</sup></b> | C <sub>40</sub> H <sub>78</sub> NO <sub>8</sub> P | 2 |
| PC 32:0    | Glycerophospholipids [GP]/Glycerophosphocholines | 772.599 | 772.52522 | -0.382 | <b>[M+K]<sup>+</sup>, [M+Na]<sup>+</sup>, [M+H]<sup>+</sup></b> | C <sub>40</sub> H <sub>80</sub> NO <sub>8</sub> P | 2 |
| PC 38:5    | Glycerophospholipids [GP]/Glycerophosphocholines | 808.599 | 808.58554 | -0.356 | <b>[M+H]<sup>+</sup></b>                                        | C <sub>46</sub> H <sub>82</sub> NO <sub>8</sub> P | 2 |
| PC O-36:2  | Glycerophospholipids [GP]/Glycerophosphocholines | 772.599 | 772.62126 | -0.341 | <b>[M+H]<sup>+</sup>, [M+K]<sup>+</sup></b>                     | C <sub>44</sub> H <sub>86</sub> NO <sub>7</sub> P | 2 |
| PC O-31:1  | Glycerophospholipids [GP]/Glycerophosphocholines | 706.526 | 706.50151 | -0.332 | <b>[M+H]<sup>+</sup>, [M+K]<sup>+</sup></b>                     | C <sub>37</sub> H <sub>72</sub> NO <sub>9</sub> P | 3 |
| PC O-42:4  | Glycerophospholipids [GP]/Glycerophosphocholines | 874.682 | 874.66576 | -0.275 | <b>[M+Na]<sup>+</sup>, [M+H]<sup>+</sup>, [M+K]<sup>+</sup></b> | C <sub>50</sub> H <sub>94</sub> NO <sub>7</sub> P | 3 |
| LPC 16:0   | Glycerophospholipids [GP]/Glycerophosphocholines | 496.343 | 496.33977 | -0.253 | <b>[M+H]<sup>+</sup>, [M+K]<sup>+</sup>, [M+Na]<sup>+</sup></b> | C <sub>24</sub> H <sub>50</sub> NO <sub>7</sub> P | 2 |
| LPC 18:0   | Glycerophospholipids [GP]/Glycerophosphocholines | 524.401 | 524.37106 | -0.235 | <b>[M+H]<sup>+</sup>, [M+Na]<sup>+</sup>, [M+K]<sup>+</sup></b> | C <sub>26</sub> H <sub>54</sub> NO <sub>7</sub> P | 2 |
| PC 20:1    | Glycerophospholipids [GP]/Glycerophosphocholines | 564.291 | 564.36595 | -0.198 | <b>[M+H]<sup>+</sup>, [M+K]<sup>+</sup>, [M+Na]<sup>+</sup></b> | C <sub>28</sub> H <sub>54</sub> NO <sub>8</sub> P | 3 |
| LPC 20:2   | Glycerophospholipids [GP]/Glycerophosphocholines | 548.398 | 548.37105 | -0.197 | <b>[M+H]<sup>+</sup>, [M+Na]<sup>+</sup></b>                    | C <sub>28</sub> H <sub>54</sub> NO <sub>7</sub> P | 3 |
| LPC 18:1   | Glycerophospholipids [GP]/Glycerophosphocholines | 592.423 | 592.39726 | -0.187 | <b>[M+H]<sup>+</sup>, [M+K]<sup>+</sup>, [M+Na]<sup>+</sup></b> | C <sub>30</sub> H <sub>58</sub> NO <sub>8</sub> P | 3 |
| PC 38:6    | Glycerophospholipids [GP]/Glycerophosphocholines | 806.588 | 806.57025 | -0.085 | <b>[M+H]<sup>+</sup></b>                                        | C <sub>46</sub> H <sub>80</sub> NO <sub>8</sub> P | 2 |
| PC O-30:0  | Glycerophospholipids [GP]/Glycerophosphocholines | 692.553 | 692.55883 | -0.049 | <b>[M+H]<sup>+</sup>, [M+Na]<sup>+</sup>, [M+K]<sup>+</sup></b> | C <sub>38</sub> H <sub>78</sub> NO <sub>7</sub> P | 3 |
| PC 30:0    | Glycerophospholipids [GP]/Glycerophosphocholines | 744.497 | 744.49407 | -0.046 | <b>[M+K]<sup>+</sup>, [M+Na]<sup>+</sup>, [M+H]<sup>+</sup></b> | C <sub>38</sub> H <sub>76</sub> NO <sub>8</sub> P | 2 |
| PC O-38:4  | Glycerophospholipids [GP]/Glycerophosphocholines | 763.492 | 763.46764 | -0.003 | <b>[M+K]<sup>+</sup>, [M+H]<sup>+</sup>, [M+Na]<sup>+</sup></b> | C <sub>41</sub> H <sub>73</sub> O <sub>8</sub> P  | 3 |
| PC O-32:2  | Glycerophospholipids [GP]/Glycerophosphocholines | 551.511 | 551.50341 | 0.007  | <b>[M+H]<sup>+</sup>, [M+Na]<sup>+</sup></b>                    | C <sub>35</sub> H <sub>66</sub> O <sub>4</sub>    | 3 |
| PC dO-34:4 | Glycerophospholipids [GP]/Glycerophosphocholines | 748.579 | 748.56149 | 0.019  | <b>[M+Na]<sup>+</sup>, [M+K]<sup>+</sup></b>                    | C <sub>42</sub> H <sub>80</sub> NO <sub>6</sub> P | 3 |
| LPC O-16:2 | Glycerophospholipids [GP]/Glycerophosphocholines | 478.322 | 478.32923 | 0.029  | <b>[M+H]<sup>+</sup>, [M+K]<sup>+</sup>, [M+Na]<sup>+</sup></b> | C <sub>24</sub> H <sub>48</sub> NO <sub>6</sub> P | 3 |
| LPC O-14:1 | Glycerophospholipids [GP]/Glycerophosphocholines | 450.299 | 450.29915 | 0.035  | <b>[M-H]<sup>-</sup></b>                                        | C <sub>22</sub> H <sub>46</sub> NO <sub>6</sub> P | 3 |

|            |                                                  |         |           |       |                                                               |                                                    |   |
|------------|--------------------------------------------------|---------|-----------|-------|---------------------------------------------------------------|----------------------------------------------------|---|
| LPC O-18:2 | Glycerophospholipids [GP]/Glycerophosphocholines | 506.371 | 506.36053 | 0.046 | [M+H] <sup>+</sup> , [M+Na] <sup>+</sup> , [M+K] <sup>+</sup> | C <sub>26</sub> H <sub>52</sub> NO <sub>6</sub> P  | 3 |
| PC 21:1;O  | Glycerophospholipids [GP]/Glycerophosphocholines | 594.374 | 594.37660 | 0.046 | [M+H] <sup>+</sup> , [M+Na] <sup>+</sup> , [M+K] <sup>+</sup> | C <sub>29</sub> H <sub>56</sub> NO <sub>9</sub> P  | 3 |
| PC 40:6    | Glycerophospholipids [GP]/Glycerophosphocholines | 834.601 | 834.60136 | 0.049 | [M+H] <sup>+</sup>                                            | C <sub>48</sub> H <sub>84</sub> NO <sub>8</sub> P  | 2 |
| LPC O-16:1 | Glycerophospholipids [GP]/Glycerophosphocholines | 480.369 | 480.34488 | 0.057 | [M+H] <sup>+</sup>                                            | C <sub>24</sub> H <sub>50</sub> NO <sub>6</sub> P  | 2 |
| PC 34:3    | Glycerophospholipids [GP]/Glycerophosphocholines | 756.566 | 756.55419 | 0.063 | [M+H] <sup>+</sup>                                            | C <sub>42</sub> H <sub>78</sub> NO <sub>8</sub> P  | 2 |
| PC 21:1    | Glycerophospholipids [GP]/Glycerophosphocholines | 578.412 | 578.38163 | 0.064 | [M+H] <sup>+</sup> , [M+Na] <sup>+</sup> , [M+K] <sup>+</sup> | C <sub>29</sub> H <sub>56</sub> NO <sub>8</sub> P  | 3 |
| PC 33:0    | Glycerophospholipids [GP]/Glycerophosphocholines | 786.591 | 786.54110 | 0.064 | [M+K] <sup>+</sup> , [M+Na] <sup>+</sup> , [M+H] <sup>+</sup> | C <sub>41</sub> H <sub>82</sub> NO <sub>8</sub> P  | 2 |
| PC 26:1    | Glycerophospholipids [GP]/Glycerophosphocholines | 648.485 | 648.45987 | 0.065 | [M+H] <sup>+</sup> , [M+K] <sup>+</sup> , [M+Na] <sup>+</sup> | C <sub>34</sub> H <sub>66</sub> NO <sub>8</sub> P  | 3 |
| LPC O-16:0 | Glycerophospholipids [GP]/Glycerophosphocholines | 482.411 | 482.36052 | 0.071 | [M+H] <sup>+</sup>                                            | C <sub>24</sub> H <sub>52</sub> NO <sub>6</sub> P  | 3 |
| PC 26:0    | Glycerophospholipids [GP]/Glycerophosphocholines | 688.412 | 688.43153 | 0.075 | [M+K] <sup>+</sup> , [M+H] <sup>+</sup>                       | C <sub>34</sub> H <sub>68</sub> NO <sub>8</sub> P  | 3 |
| PC O-32:0  | Glycerophospholipids [GP]/Glycerophosphocholines | 720.596 | 720.59017 | 0.076 | [M+H] <sup>+</sup> , [M+K] <sup>+</sup> , [M+Na] <sup>+</sup> | C <sub>40</sub> H <sub>82</sub> NO <sub>7</sub> P  | 3 |
| PC O-44:4  | Glycerophospholipids [GP]/Glycerophosphocholines | 900.744 | 900.68175 | 0.079 | [M+Na] <sup>+</sup> , [M+K] <sup>+</sup> , [M+H] <sup>+</sup> | C <sub>52</sub> H <sub>96</sub> NO <sub>7</sub> P  | 2 |
| LPC O-18:1 | Glycerophospholipids [GP]/Glycerophosphocholines | 508.382 | 508.37618 | 0.081 | [M+H] <sup>+</sup> , [M+K] <sup>+</sup> , [M+Na] <sup>+</sup> | C <sub>26</sub> H <sub>54</sub> NO <sub>6</sub> P  | 3 |
| LPC 22:6   | Glycerophospholipids [GP]/Glycerophosphocholines | 568.371 | 568.33958 | 0.084 | [M+H] <sup>+</sup>                                            | C <sub>30</sub> H <sub>50</sub> NO <sub>7</sub> P  | 3 |
| PC O-36:1  | Glycerophospholipids [GP]/Glycerophosphocholines | 774.670 | 774.63723 | 0.089 | [M+H] <sup>+</sup>                                            | C <sub>44</sub> H <sub>88</sub> NO <sub>7</sub> P  | 3 |
| PC O-32:1  | Glycerophospholipids [GP]/Glycerophosphocholines | 740.581 | 740.55654 | 0.091 | [M+Na] <sup>+</sup> , [M+H] <sup>+</sup>                      | C <sub>40</sub> H <sub>80</sub> NO <sub>7</sub> P  | 2 |
| LPC 22:6   | Glycerophospholipids [GP]/Glycerophosphocholines | 526.322 | 526.29278 | 0.092 | [M+H] <sup>+</sup>                                            | C <sub>27</sub> H <sub>44</sub> NO <sub>7</sub> P  | 3 |
| PC O-42:5  | Glycerophospholipids [GP]/Glycerophosphocholines | 872.731 | 872.65043 | 0.104 | [M+Na] <sup>+</sup> , [M+K] <sup>+</sup> , [M+H] <sup>+</sup> | C <sub>50</sub> H <sub>92</sub> NO <sub>7</sub> P  | 3 |
| LPC O-20:0 | Glycerophospholipids [GP]/Glycerophosphocholines | 538.451 | 538.42316 | 0.108 | [M+H] <sup>+</sup>                                            | C <sub>28</sub> H <sub>60</sub> NO <sub>6</sub> P  | 3 |
| PC 24:0    | Glycerophospholipids [GP]/Glycerophosphocholines | 622.469 | 622.44425 | 0.112 | [M+H] <sup>+</sup> , [M+K] <sup>+</sup> , [M+Na] <sup>+</sup> | C <sub>32</sub> H <sub>64</sub> NO <sub>8</sub> P  | 3 |
| LPC 18:2   | Glycerophospholipids [GP]/Glycerophosphocholines | 520.333 | 520.33979 | 0.118 | [M+H] <sup>+</sup>                                            | C <sub>26</sub> H <sub>50</sub> NO <sub>7</sub> P  | 2 |
| PC dO-36:4 | Glycerophospholipids [GP]/Glycerophosphocholines | 776.622 | 776.59293 | 0.119 | [M+Na] <sup>+</sup> , [M+K] <sup>+</sup>                      | C <sub>44</sub> H <sub>84</sub> NO <sub>6</sub> P  | 3 |
| LPC 15:0   | Glycerophospholipids [GP]/Glycerophosphocholines | 480.328 | 480.31018 | 0.139 | [M-H] <sup>-</sup>                                            | C <sub>23</sub> H <sub>48</sub> NO <sub>7</sub> P  | 3 |
| PC 40:4    | Glycerophospholipids [GP]/Glycerophosphocholines | 846.551 | 846.63481 | 0.144 | [M+Na] <sup>+</sup> , [M+H] <sup>+</sup> , [M+K] <sup>+</sup> | C <sub>48</sub> H <sub>90</sub> NO <sub>7</sub> P  | 3 |
| PC O-38:1  | Glycerophospholipids [GP]/Glycerophosphocholines | 840.649 | 840.62446 | 0.151 | [M+K] <sup>+</sup> , [M+H] <sup>+</sup>                       | C <sub>46</sub> H <sub>92</sub> NO <sub>7</sub> P  | 3 |
| PC O-38:5  | Glycerophospholipids [GP]/Glycerophosphocholines | 832.561 | 832.56186 | 0.153 | [M+K] <sup>+</sup> , [M+Na] <sup>+</sup> , [M+H] <sup>+</sup> | C <sub>46</sub> H <sub>84</sub> NO <sub>7</sub> P  | 2 |
| PC 21:1;O2 | Glycerophospholipids [GP]/Glycerophosphocholines | 610.318 | 610.37153 | 0.156 | [M+H] <sup>+</sup> , [M+K] <sup>+</sup> , [M+Na] <sup>+</sup> | C <sub>29</sub> H <sub>56</sub> NO <sub>10</sub> P | 3 |
| PC 44:0    | Glycerophospholipids [GP]/Glycerophosphocholines | 817.473 | 817.66815 | 0.165 | [M+H] <sup>+</sup>                                            | C <sub>47</sub> H <sub>93</sub> O <sub>8</sub> P   | 3 |
| PC 25:1;O  | Glycerophospholipids [GP]/Glycerophosphocholines | 650.459 | 650.43921 | 0.183 | [M+H] <sup>+</sup> , [M+K] <sup>+</sup> , [M+Na] <sup>+</sup> | C <sub>33</sub> H <sub>64</sub> NO <sub>9</sub> P  | 3 |
| PC 19:1    | Glycerophospholipids [GP]/Glycerophosphocholines | 550.401 | 550.35036 | 0.199 | [M+H] <sup>+</sup> , [M+Na] <sup>+</sup> , [M+K] <sup>+</sup> | C <sub>27</sub> H <sub>52</sub> NO <sub>8</sub> P  | 3 |
| PC O-40:5  | Glycerophospholipids [GP]/Glycerophosphocholines | 860.602 | 860.59319 | 0.203 | [M+K] <sup>+</sup> , [M+H] <sup>+</sup> , [M+Na] <sup>+</sup> | C <sub>48</sub> H <sub>88</sub> NO <sub>7</sub> P  | 3 |
| PC O-38:2  | Glycerophospholipids [GP]/Glycerophosphocholines | 800.671 | 800.65301 | 0.229 | [M+H] <sup>+</sup>                                            | C <sub>46</sub> H <sub>90</sub> NO <sub>7</sub> P  | 3 |
| LPC 20:1   | Glycerophospholipids [GP]/Glycerophosphocholines | 550.401 | 550.38675 | 0.238 | [M+H] <sup>+</sup> , [M+K] <sup>+</sup> , [M+Na] <sup>+</sup> | C <sub>28</sub> H <sub>56</sub> NO <sub>7</sub> P  | 3 |



|            |                                                       |         |           |        |                                                                 |                                                   |   |
|------------|-------------------------------------------------------|---------|-----------|--------|-----------------------------------------------------------------|---------------------------------------------------|---|
| PC 38:1    | Glycerophospholipids [GP]/Glycerophosphocholines      | 854.745 | 854.69993 | 0.249  | <b>[M+H]<sup>+</sup></b>                                        | C <sub>50</sub> H <sub>96</sub> NO <sub>7</sub> P | 2 |
| PC O-42:6  | Glycerophospholipids [GP]/Glycerophosphocholines      | 870.655 | 870.63493 | 0.292  | <b>[M+Na]<sup>+</sup>, [M+K]<sup>+</sup>, [M+H]<sup>+</sup></b> | C <sub>50</sub> H <sub>90</sub> NO <sub>7</sub> P | 3 |
| PC O-38:3  | Glycerophospholipids [GP]/Glycerophosphocholines      | 798.662 | 798.63739 | 0.327  | <b>[M+H]<sup>+</sup></b>                                        | C <sub>46</sub> H <sub>88</sub> NO <sub>7</sub> P | 3 |
| PC O-34:2  | Glycerophospholipids [GP]/Glycerophosphocholines      | 744.615 | 744.59023 | 0.328  | <b>[M+H]<sup>+</sup>, [M+K]<sup>+</sup></b>                     | C <sub>42</sub> H <sub>82</sub> NO <sub>7</sub> P | 2 |
| PC 34:1    | Glycerophospholipids [GP]/Glycerophosphocholines      | 798.542 | 798.54104 | 0.339  | <b>[M+K]<sup>+</sup>, [M+Na]<sup>+</sup>, [M+H]<sup>+</sup></b> | C <sub>42</sub> H <sub>82</sub> NO <sub>8</sub> P | 2 |
| LPC O-18:1 | Glycerophospholipids [GP]/Glycerophosphocholines      | 464.315 | 464.31516 | 0.343  | <b>[M-H]<sup>-</sup></b>                                        | C <sub>23</sub> H <sub>48</sub> NO <sub>6</sub> P | 2 |
| LPC 20:3   | Glycerophospholipids [GP]/Glycerophosphocholines      | 546.381 | 546.35556 | 0.351  | <b>[M+H]<sup>+</sup></b>                                        | C <sub>28</sub> H <sub>52</sub> NO <sub>7</sub> P | 3 |
| PC O-36:4  | Glycerophospholipids [GP]/Glycerophosphocholines      | 768.665 | 768.59072 | 0.459  | <b>[M+H]<sup>+</sup></b>                                        | C <sub>44</sub> H <sub>82</sub> NO <sub>7</sub> P | 2 |
| PC 38:1    | Glycerophospholipids [GP]/Glycerophosphocholines      | 816.662 | 816.64806 | 0.536  | <b>[M+H]<sup>+</sup>, [M+K]<sup>+</sup></b>                     | C <sub>46</sub> H <sub>90</sub> NO <sub>8</sub> P | 3 |
| PC O-40:6  | Glycerophospholipids [GP]/Glycerophosphocholines      | 820.641 | 820.62198 | 0.671  | <b>[M+H]<sup>+</sup>, [M+Na]<sup>+</sup></b>                    | C <sub>48</sub> H <sub>86</sub> NO <sub>7</sub> P | 3 |
| PC O-36:3  | Glycerophospholipids [GP]/Glycerophosphocholines      | 770.558 | 770.60615 | 0.779  | <b>[M+H]<sup>+</sup></b>                                        | C <sub>44</sub> H <sub>84</sub> NO <sub>7</sub> P | 2 |
| PC O-38:6  | Glycerophospholipids [GP]/Glycerophosphocholines      | 792.614 | 792.58907 | 0.942  | <b>[M+H]<sup>+</sup>, [M+K]<sup>+</sup></b>                     | C <sub>46</sub> H <sub>82</sub> NO <sub>7</sub> P | 2 |
| PC 40:4    | Glycerophospholipids [GP]/Glycerophosphocholines      | 838.657 | 838.63281 | 0.985  | <b>[M+H]<sup>+</sup>, [M+Na]<sup>+</sup>, [M+K]<sup>+</sup></b> | C <sub>48</sub> H <sub>88</sub> NO <sub>8</sub> P | 2 |
| PC 38:2    | Glycerophospholipids [GP]/Glycerophosphocholines      | 814.671 | 814.63243 | 1.516  | <b>[M+H]<sup>+</sup>, [M+K]<sup>+</sup></b>                     | C <sub>46</sub> H <sub>88</sub> NO <sub>8</sub> P | 2 |
| LPC 14:1   | Glycerophospholipids [GP]/Glycerophosphocholines      | 464.279 | 464.27852 | 0.553  | <b>[M-H]<sup>-</sup></b>                                        | C <sub>22</sub> H <sub>44</sub> NO <sub>7</sub> P | 3 |
| LPC 14:0   | Glycerophospholipids [GP]/Glycerophosphocholines      | 466.293 | 466.29401 | -0.208 | <b>[M-H]<sup>-</sup></b>                                        | C <sub>22</sub> H <sub>46</sub> NO <sub>7</sub> P | 3 |
| PC 16:0    | Glycerophospholipids [GP]/Glycerophosphocholines      | 508.336 | 508.30512 | 1.263  | <b>[M-H]<sup>-</sup></b>                                        | C <sub>24</sub> H <sub>48</sub> NO <sub>8</sub> P | 3 |
| PC 34:2    | Glycerophospholipids [GP]/Glycerophosphocholines      | 758.574 | 758.56961 | 0.235  | <b>[M+H]<sup>+</sup></b>                                        | C <sub>42</sub> H <sub>80</sub> NO <sub>8</sub> P | 2 |
| PC dO-37:4 | Glycerophospholipids [GP]/Glycerophosphocholines      | 766.625 | 766.61071 | -0.251 | <b>[M-H]<sup>-</sup></b>                                        | C <sub>45</sub> H <sub>86</sub> NO <sub>6</sub> P | 3 |
| PC 36:1    | Glycerophospholipids [GP]/Glycerophosphocholines      | 788.632 | 788.61614 | -0.306 | <b>[M+H]<sup>+</sup>, [M+K]<sup>+</sup></b>                     | C <sub>44</sub> H <sub>86</sub> NO <sub>8</sub> P | 2 |
| PC 22:1    | Glycerophospholipids [GP]/Glycerophosphocholines      | 614.223 | 614.37953 | 0.496  | <b>[M+Na]<sup>+</sup></b>                                       | C <sub>30</sub> H <sub>58</sub> NO <sub>8</sub> P | 3 |
| PE O-30:0  | Glycerophospholipids [GP]/Glycerophosphoethanolamines | 650.519 | 650.50957 | -3.552 | <b>[M+H]<sup>+</sup></b>                                        | C <sub>35</sub> H <sub>72</sub> NO <sub>7</sub> P | 3 |
| PE O-38:6  | Glycerophospholipids [GP]/Glycerophosphoethanolamines | 706.526 | 707.49862 | -3.365 | <b>[M+H]<sup>+</sup>, [M+Na]<sup>+</sup></b>                    | C <sub>41</sub> H <sub>71</sub> O <sub>7</sub> P  | 3 |
| PE O-42:7  | Glycerophospholipids [GP]/Glycerophosphoethanolamines | 804.635 | 804.58778 | -2.992 | <b>[M+H]<sup>+</sup></b>                                        | C <sub>47</sub> H <sub>82</sub> NO <sub>7</sub> P | 3 |
| PE 42:7    | Glycerophospholipids [GP]/Glycerophosphoethanolamines | 818.479 | 818.56699 | -2.834 | <b>[M+H]<sup>+</sup></b>                                        | C <sub>47</sub> H <sub>80</sub> NO <sub>8</sub> P | 3 |
| LPE 20:4   | Glycerophospholipids [GP]/Glycerophosphoethanolamines | 540.272 | 540.24859 | -0.299 | <b>[M+K]<sup>+</sup>, [M+H]<sup>+</sup>, [M+Na]<sup>+</sup></b> | C <sub>25</sub> H <sub>44</sub> NO <sub>7</sub> P | 3 |
| PE 29:2    | Glycerophospholipids [GP]/Glycerophosphoethanolamines | 646.469 | 646.44411 | -0.183 | <b>[M+H]<sup>+</sup></b>                                        | C <sub>34</sub> H <sub>64</sub> NO <sub>8</sub> P | 3 |
| PE 36:1    | Glycerophospholipids [GP]/Glycerophosphoethanolamines | 746.597 | 746.56931 | -0.139 | <b>[M+H]<sup>+</sup>, [M+Na]<sup>+</sup></b>                    | C <sub>41</sub> H <sub>80</sub> NO <sub>8</sub> P | 2 |
| PE 30:0    | Glycerophospholipids [GP]/Glycerophosphoethanolamines | 664.511 | 664.49102 | -0.131 | <b>[M+H]<sup>+</sup></b>                                        | C <sub>35</sub> H <sub>70</sub> NO <sub>8</sub> P | 3 |
| PE 42:9    | Glycerophospholipids [GP]/Glycerophosphoethanolamines | 814.561 | 814.53655 | -1.793 | <b>[M+H]<sup>+</sup></b>                                        | C <sub>47</sub> H <sub>76</sub> NO <sub>8</sub> P | 3 |
| PE O-36:0  | Glycerophospholipids [GP]/Glycerophosphoethanolamines | 734.676 | 734.60574 | -0.101 | <b>[M+H]<sup>+</sup></b>                                        | C <sub>41</sub> H <sub>84</sub> NO <sub>7</sub> P | 3 |
| LPE 18:0   | Glycerophospholipids [GP]/Glycerophosphoethanolamines | 482.351 | 482.32414 | -0.002 | <b>[M+H]<sup>+</sup>, [M+K]<sup>+</sup></b>                     | C <sub>23</sub> H <sub>48</sub> NO <sub>7</sub> P | 2 |
| LPE 18:1   | Glycerophospholipids [GP]/Glycerophosphoethanolamines | 480.312 | 480.30849 | 0.012  | <b>[M+H]<sup>+</sup></b>                                        | C <sub>23</sub> H <sub>46</sub> NO <sub>7</sub> P | 2 |

|             |                                                       |         |           |        |                                                                 |                                                    |   |
|-------------|-------------------------------------------------------|---------|-----------|--------|-----------------------------------------------------------------|----------------------------------------------------|---|
| LPE 20:0    | Glycerophospholipids [GP]/Glycerophosphoethanolamines | 510.381 | 510.35541 | 0.074  | <b>[M+H]<sup>+</sup></b>                                        | C <sub>25</sub> H <sub>52</sub> NO <sub>7</sub> P  | 2 |
| PE 28:0     | Glycerophospholipids [GP]/Glycerophosphoethanolamines | 636.438 | 636.45997 | 0.083  | <b>[M+H]<sup>+</sup>, [M+K]<sup>+</sup>, [M+Na]<sup>+</sup></b> | C <sub>33</sub> H <sub>66</sub> NO <sub>8</sub> P  | 3 |
| PE 36:2     | Glycerophospholipids [GP]/Glycerophosphoethanolamines | 744.586 | 744.55392 | 0.104  | <b>[M+H]<sup>+</sup>, [M+Na]<sup>+</sup></b>                    | C <sub>41</sub> H <sub>78</sub> NO <sub>8</sub> P  | 2 |
| PE 30:1     | Glycerophospholipids [GP]/Glycerophosphoethanolamines | 662.442 | 662.47561 | 0.105  | <b>[M+H]<sup>+</sup></b>                                        | C <sub>35</sub> H <sub>68</sub> NO <sub>8</sub> P  | 3 |
| PE 20:0     | Glycerophospholipids [GP]/Glycerophosphoethanolamines | 562.311 | 562.29059 | 0.115  | <b>[M+K]<sup>+</sup>, [M+H]<sup>+</sup>, [M+Na]<sup>+</sup></b> | C <sub>25</sub> H <sub>50</sub> NO <sub>8</sub> P  | 3 |
| PE 27:1     | Glycerophospholipids [GP]/Glycerophosphoethanolamines | 606.413 | 620.42859 | 0.116  | <b>[M+H]<sup>+</sup>, [M+K]<sup>+</sup>, [M+Na]<sup>+</sup></b> | C <sub>32</sub> H <sub>62</sub> NO <sub>8</sub> P  | 3 |
| PE O-42:5   | Glycerophospholipids [GP]/Glycerophosphoethanolamines | 808.688 | 808.62083 | 0.134  | <b>[M+H]<sup>+</sup></b>                                        | C <sub>47</sub> H <sub>86</sub> NO <sub>7</sub> P  | 3 |
| PE 28:2     | Glycerophospholipids [GP]/Glycerophosphoethanolamines | 632.445 | 632.42869 | 0.169  | <b>[M+H]<sup>+</sup></b>                                        | C <sub>33</sub> H <sub>62</sub> NO <sub>8</sub> P  | 3 |
| PE 28:1     | Glycerophospholipids [GP]/Glycerophosphoethanolamines | 606.413 | 606.40299 | 0.196  | <b>[M+H]<sup>+</sup>, [M+Na]<sup>+</sup></b>                    | C <sub>31</sub> H <sub>60</sub> NO <sub>8</sub> P  | 3 |
| PE 42:4     | Glycerophospholipids [GP]/Glycerophosphoethanolamines | 824.632 | 824.61657 | 0.205  | <b>[M+H]<sup>+</sup></b>                                        | C <sub>47</sub> H <sub>86</sub> NO <sub>8</sub> P  | 3 |
| PE 38:1     | Glycerophospholipids [GP]/Glycerophosphoethanolamines | 774.611 | 774.60082 | 0.276  | <b>[M+H]<sup>+</sup>, [M+Na]<sup>+</sup>, [M+K]<sup>+</sup></b> | C <sub>43</sub> H <sub>84</sub> NO <sub>8</sub> P  | 2 |
| PE 34:0     | Glycerophospholipids [GP]/Glycerophosphoethanolamines | 718.541 | 718.53932 | 0.292  | <b>[M-H]<sup>-</sup>, [M+Cl]<sup>-</sup></b>                    | C <sub>39</sub> H <sub>78</sub> NO <sub>8</sub> P  | 2 |
| PE 40:3     | Glycerophospholipids [GP]/Glycerophosphoethanolamines | 798.632 | 798.60109 | 0.298  | <b>[M+H]<sup>+</sup></b>                                        | C <sub>45</sub> H <sub>84</sub> NO <sub>8</sub> P  | 3 |
| PE 38:4     | Glycerophospholipids [GP]/Glycerophosphoethanolamines | 768.576 | 768.55409 | 0.419  | <b>[M+H]<sup>+</sup>, [M+Na]<sup>+</sup></b>                    | C <sub>43</sub> H <sub>78</sub> NO <sub>8</sub> P  | 2 |
| PE 12:0     | Glycerophospholipids [GP]/Glycerophosphoethanolamines | 412.214 | 412.20957 | 0.425  | <b>[M+H]<sup>+</sup></b>                                        | C <sub>17</sub> H <sub>34</sub> NO <sub>8</sub> P  | 3 |
| LPE 18:2    | Glycerophospholipids [GP]/Glycerophosphoethanolamines | 478.322 | 478.29299 | 0.449  | <b>[M+H]<sup>+</sup>, [M+Na]<sup>+</sup></b>                    | C <sub>23</sub> H <sub>44</sub> NO <sub>7</sub> P  | 3 |
| LPE 20:4    | Glycerophospholipids [GP]/Glycerophosphoethanolamines | 500.279 | 500.27906 | 0.594  | <b>[M-H]<sup>-</sup></b>                                        | C <sub>25</sub> H <sub>44</sub> NO <sub>7</sub> P  | 3 |
| PE 40:1     | Glycerophospholipids [GP]/Glycerophosphoethanolamines | 802.505 | 802.63212 | 0.712  | <b>[M+H]<sup>+</sup></b>                                        | C <sub>45</sub> H <sub>88</sub> NO <sub>8</sub> P  | 3 |
| PE 42:8     | Glycerophospholipids [GP]/Glycerophosphoethanolamines | 838.561 | 838.53671 | 1.161  | <b>[M+Na]<sup>+</sup>, [M+H]<sup>+</sup></b>                    | C <sub>47</sub> H <sub>78</sub> NO <sub>8</sub> P  | 3 |
| PE 40:2     | Glycerophospholipids [GP]/Glycerophosphoethanolamines | 800.553 | 800.61639 | 1.393  | <b>[M+H]<sup>+</sup></b>                                        | C <sub>45</sub> H <sub>86</sub> NO <sub>8</sub> P  | 2 |
| LPE 22:4    | Glycerophospholipids [GP]/Glycerophosphoethanolamines | 528.334 | 528.30999 | 0.808  | <b>[M-H]<sup>-</sup></b>                                        | C <sub>27</sub> H <sub>48</sub> NO <sub>7</sub> P  | 3 |
| PE O-34:1   | Glycerophospholipids [GP]/Glycerophosphoethanolamines | 702.554 | 702.54427 | -0.063 | <b>[M-H]<sup>-</sup></b>                                        | C <sub>39</sub> H <sub>78</sub> NO <sub>7</sub> P  | 3 |
| PC 33:3     | Glycerophospholipids [GP]/Glycerophosphoethanolamines | 742.539 | 742.53825 | 0.161  | <b>[M+H]<sup>+</sup></b>                                        | C <sub>41</sub> H <sub>76</sub> NO <sub>8</sub> P  | 2 |
| PE O-38:6   | Glycerophospholipids [GP]/Glycerophosphoethanolamines | 750.535 | 750.54368 | 0.042  | <b>[M+H]<sup>+</sup>, [M+Na]<sup>+</sup></b>                    | C <sub>43</sub> H <sub>76</sub> NO <sub>7</sub> P  | 2 |
| PG 39:8     | Glycerophospholipids [GP]/Glycerophosphoglycerols     | 805.552 | 805.49831 | -3.869 | <b>[M+H]<sup>+</sup></b>                                        | C <sub>45</sub> H <sub>73</sub> O <sub>10</sub> P  | 3 |
| PG 38:5     | Glycerophospholipids [GP]/Glycerophosphoglycerols     | 835.572 | 835.48881 | 0.259  | <b>[M+K]<sup>+</sup></b>                                        | C <sub>44</sub> H <sub>77</sub> O <sub>10</sub> P  | 3 |
| PI 40:7     | Glycerophospholipids [GP]/Glycerophosphoinositols     | 909.559 | 909.54688 | -1.812 | <b>[M+H]<sup>+</sup>, [M+Na]<sup>+</sup></b>                    | C <sub>49</sub> H <sub>81</sub> O <sub>13</sub> P  | 3 |
| LPI 22:6    | Glycerophospholipids [GP]/Glycerophosphoinositols     | 645.328 | 645.30369 | 0.379  | <b>[M+H]<sup>+</sup></b>                                        | C <sub>31</sub> H <sub>49</sub> O <sub>12</sub> P  | 3 |
| PI-Cer 36:1 | Glycerophospholipids [GP]/Glycerophosphoinositols     | 808.599 | 808.56945 | 0.399  | <b>[M+H]<sup>+</sup>, [M+K]<sup>+</sup>, [M+Na]<sup>+</sup></b> | C <sub>42</sub> H <sub>82</sub> NO <sub>11</sub> P | 3 |
| LPI 18:2    | Glycerophospholipids [GP]/Glycerophosphoinositols     | 597.331 | 597.30428 | 1.094  | <b>[M+H]<sup>+</sup></b>                                        | C <sub>27</sub> H <sub>49</sub> O <sub>12</sub> P  | 3 |
| LPI 18:0    | Glycerophospholipids [GP]/Glycerophosphoinositols     | 599.361 | 599.31944 | 1.246  | <b>[M-H]<sup>-</sup></b>                                        | C <sub>27</sub> H <sub>53</sub> O <sub>12</sub> P  | 2 |
| PS O-29:1   | Glycerophospholipids [GP]/Glycerophosphoserines       | 678.472 | 678.46714 | -4.873 | <b>[M+H]<sup>+</sup>, [M+Na]<sup>+</sup>, [M+K]<sup>+</sup></b> | C <sub>35</sub> H <sub>68</sub> NO <sub>9</sub> P  | 3 |
| PS O-35:0   | Glycerophospholipids [GP]/Glycerophosphoserines       | 764.553 | 764.57765 | -3.022 | <b>[M+H]<sup>+</sup></b>                                        | C <sub>41</sub> H <sub>82</sub> NO <sub>9</sub> P  | 3 |

|                 |                                                 |          |            |        |                                                                 |                                                                 |   |
|-----------------|-------------------------------------------------|----------|------------|--------|-----------------------------------------------------------------|-----------------------------------------------------------------|---|
| PS O-39:2       | Glycerophospholipids [GP]/Glycerophosphoserines | 816.662  | 816.60901  | -2.827 | <b>[M+H]<sup>+</sup></b>                                        | C <sub>45</sub> H <sub>86</sub> NO <sub>9</sub> P               | 3 |
| PS 32:1         | Glycerophospholipids [GP]/Glycerophosphoserines | 734.558  | 734.49639  | -0.369 | <b>[M+H]<sup>+</sup>, [M+K]<sup>+</sup></b>                     | C <sub>38</sub> H <sub>72</sub> NO <sub>10</sub> P              | 3 |
| PS 28:1         | Glycerophospholipids [GP]/Glycerophosphoserines | 678.472  | 678.43389  | -0.353 | <b>[M+H]<sup>+</sup>, [M+K]<sup>+</sup></b>                     | C <sub>34</sub> H <sub>64</sub> NO <sub>10</sub> P              | 3 |
| PS 31:2         | Glycerophospholipids [GP]/Glycerophosphoserines | 718.496  | 718.46512  | -0.331 | <b>[M+H]<sup>+</sup></b>                                        | C <sub>37</sub> H <sub>68</sub> NO <sub>10</sub> P              | 3 |
| PS 32:3         | Glycerophospholipids [GP]/Glycerophosphoserines | 730.490  | 730.46505  | -0.322 | <b>[M+H]<sup>+</sup>, [M+K]<sup>+</sup>, [M+Na]<sup>+</sup></b> | C <sub>38</sub> H <sub>68</sub> NO <sub>10</sub> P              | 3 |
| PS 29:0         | Glycerophospholipids [GP]/Glycerophosphoserines | 666.459  | 666.43402  | -0.314 | <b>[M+H]<sup>+</sup>, [M+Na]<sup>+</sup>, [M+K]<sup>+</sup></b> | C <sub>33</sub> H <sub>64</sub> NO <sub>10</sub> P              | 3 |
| PS O-32:2       | Glycerophospholipids [GP]/Glycerophosphoserines | 718.525  | 718.50159  | -0.309 | <b>[M+H]<sup>+</sup>, [M+K]<sup>+</sup>, [M+Na]<sup>+</sup></b> | C <sub>38</sub> H <sub>72</sub> NO <sub>9</sub> P               | 3 |
| PS 30:1         | Glycerophospholipids [GP]/Glycerophosphoserines | 706.526  | 706.46516  | -0.309 | <b>[M+H]<sup>+</sup>, [M+K]<sup>+</sup>, [M+Na]<sup>+</sup></b> | C <sub>36</sub> H <sub>68</sub> NO <sub>10</sub> P              | 3 |
| PS O-28:1       | Glycerophospholipids [GP]/Glycerophosphoserines | 664.451  | 664.45464  | -0.269 | <b>[M+H]<sup>+</sup>, [M+Na]<sup>+</sup>, [M+K]<sup>+</sup></b> | C <sub>34</sub> H <sub>66</sub> NO <sub>9</sub> P               | 3 |
| PS 27:0         | Glycerophospholipids [GP]/Glycerophosphoserines | 690.458  | 690.43383  | -0.248 | <b>[M+H]<sup>+</sup>, [M+K]<sup>+</sup></b>                     | C <sub>35</sub> H <sub>64</sub> NO <sub>10</sub> P              | 3 |
| PS O-31:2       | Glycerophospholipids [GP]/Glycerophosphoserines | 704.563  | 704.48606  | 0.059  | <b>[M+H]<sup>+</sup>, [M+K]<sup>+</sup></b>                     | C <sub>37</sub> H <sub>70</sub> NO <sub>9</sub> P               | 3 |
| PS O-36:3       | Glycerophospholipids [GP]/Glycerophosphoserines | 810.544  | 810.50464  | 0.075  | <b>[M+K]<sup>+</sup>, [M+H]<sup>+</sup></b>                     | C <sub>42</sub> H <sub>78</sub> NO <sub>9</sub> P               | 3 |
| PS 29:0         | Glycerophospholipids [GP]/Glycerophosphoserines | 694.490  | 694.46537  | 0.129  | <b>[M+H]<sup>+</sup>, [M+Na]<sup>+</sup>, [M+K]<sup>+</sup></b> | C <sub>35</sub> H <sub>68</sub> NO <sub>10</sub> P              | 3 |
| PS O-30:2       | Glycerophospholipids [GP]/Glycerophosphoserines | 712.461  | 712.45249  | 0.132  | <b>[M+Na]<sup>+</sup>, [M+K]<sup>+</sup>, [M+H]<sup>+</sup></b> | C <sub>36</sub> H <sub>68</sub> NO <sub>9</sub> P               | 3 |
| PS 29:1         | Glycerophospholipids [GP]/Glycerophosphoserines | 692.474  | 692.44969  | 0.159  | <b>[M+H]<sup>+</sup>, [M+K]<sup>+</sup>, [M+Na]<sup>+</sup></b> | C <sub>35</sub> H <sub>66</sub> NO <sub>10</sub> P              | 3 |
| PS 25:0         | Glycerophospholipids [GP]/Glycerophosphoserines | 638.427  | 638.40287  | 0.189  | <b>[M+H]<sup>+</sup>, [M+Na]<sup>+</sup>, [M+K]<sup>+</sup></b> | C <sub>31</sub> H <sub>60</sub> NO <sub>10</sub> P              | 3 |
| PS O-38:3       | Glycerophospholipids [GP]/Glycerophosphoserines | 800.553  | 800.58052  | 0.504  | <b>[M+H]<sup>+</sup></b>                                        | C <sub>44</sub> H <sub>82</sub> NO <sub>9</sub> P               | 3 |
| PS O-30:1       | Glycerophospholipids [GP]/Glycerophosphoserines | 714.495  | 714.47019  | 2.818  | <b>[M+Na]<sup>+</sup>, [M+H]<sup>+</sup></b>                    | C <sub>36</sub> H <sub>70</sub> NO <sub>9</sub> P               | 3 |
| PS O-37:2       | Glycerophospholipids [GP]/Glycerophosphoserines | 826.591  | 826.53947  | 3.728  | <b>[M+K]<sup>+</sup>, [M+H]<sup>+</sup></b>                     | C <sub>43</sub> H <sub>82</sub> NO <sub>9</sub> P               | 3 |
| PS 36:1         | Glycerophospholipids [GP]/Glycerophosphoserines | 524.334  | 524.29997  | 1.102  | <b>[M-H]<sup>-</sup></b>                                        | C <sub>24</sub> H <sub>48</sub> NO <sub>9</sub> P               | 3 |
| PS 25:0         | Glycerophospholipids [GP]/Glycerophosphoserines | 660.424  | 660.38482  | 0.176  | <b>[M+Na]<sup>+</sup></b>                                       | C <sub>31</sub> H <sub>60</sub> NO <sub>10</sub> P              | 3 |
| LPS 22:1        | Glycerophospholipids [GP]/Glycerophosphoserines | 602.361  | 602.34291  | 0.116  | <b>[M+Na]<sup>+</sup></b>                                       | C <sub>28</sub> H <sub>54</sub> NO <sub>9</sub> P               | 3 |
| Hex2Cer 42:2;O2 | Sphingolipids [SP]                              | 1010.714 | 1010.68933 | -0.603 | <b>[M+K]<sup>+</sup>, [M+Na]<sup>+</sup></b>                    | C <sub>54</sub> H <sub>101</sub> NO <sub>13</sub>               | 3 |
| HexCer 42:2;O2  | Sphingolipids [SP]                              | 832.678  | 832.66371  | -0.343 | <b>[M+Na]<sup>+</sup>, [M+K]<sup>+</sup></b>                    | C <sub>48</sub> H <sub>91</sub> NO <sub>8</sub>                 | 2 |
| EPC 32:1;O2     | Sphingolipids [SP]                              | 703.561  | 703.53827  | -0.333 | <b>[M+H]<sup>+</sup>, [M+Na]<sup>+</sup></b>                    | C <sub>38</sub> H <sub>75</sub> N <sub>2</sub> O <sub>7</sub> P | 3 |
| Cer 42:2;O      | Sphingolipids [SP]                              | 632.658  | 632.63397  | -0.21  | <b>[M+H]<sup>+</sup>, [M+Na]<sup>+</sup></b>                    | C <sub>42</sub> H <sub>81</sub> NO <sub>2</sub>                 | 3 |
| Hex2Cer 34:1;O2 | Sphingolipids [SP]                              | 900.611  | 900.58074  | -0.198 | <b>[M+K]<sup>+</sup>, [M+Na]<sup>+</sup></b>                    | C <sub>46</sub> H <sub>87</sub> NO <sub>13</sub>                | 2 |
| EPC 37:1;O3     | Sphingolipids [SP]                              | 757.542  | 757.52555  | -0.071 | <b>[M+K]<sup>+</sup>, [M+H]<sup>+</sup>, [M+Na]<sup>+</sup></b> | C <sub>39</sub> H <sub>79</sub> N <sub>2</sub> O <sub>7</sub> P | 2 |
| Cer 34:1;O      | Sphingolipids [SP]                              | 522.552  | 522.52436  | 0.012  | <b>[M+H]<sup>+</sup></b>                                        | C <sub>34</sub> H <sub>67</sub> NO <sub>2</sub>                 | 3 |
| CerP 44:2;O2    | Sphingolipids [SP]                              | 778.634  | 778.60839  | 0.027  | <b>[M+Na]<sup>+</sup>, [M+K]<sup>+</sup></b>                    | C <sub>44</sub> H <sub>86</sub> NO <sub>6</sub> P               | 3 |
| CerP 34:0       | Sphingolipids [SP]                              | 620.523  | 620.50138  | 0.029  | <b>[M+H]<sup>+</sup></b>                                        | C <sub>34</sub> H <sub>70</sub> NO <sub>6</sub> P               | 3 |
| CerP 32:1       | Sphingolipids [SP]                              | 590.528  | 590.45448  | 0.048  | <b>[M+H]<sup>+</sup></b>                                        | C <sub>32</sub> H <sub>64</sub> NO <sub>6</sub> P               | 3 |
| CerP 28:0       | Sphingolipids [SP]                              | 536.433  | 536.40749  | 0.124  | <b>[M+H]<sup>+</sup></b>                                        | C <sub>28</sub> H <sub>58</sub> NO <sub>6</sub> P               | 3 |

|                 |                                              |         |           |        |                                                               |                                                                 |   |
|-----------------|----------------------------------------------|---------|-----------|--------|---------------------------------------------------------------|-----------------------------------------------------------------|---|
| CerP 36:1;O2    | Sphingolipids [SP]                           | 668.504 | 668.49891 | 0.135  | [M+Na] <sup>+</sup> , [M+K] <sup>+</sup>                      | C <sub>36</sub> H <sub>72</sub> NO <sub>6</sub> P               | 3 |
| Cer 32:0        | Sphingolipids [SP]                           | 512.531 | 512.50378 | 0.149  | [M+H] <sup>+</sup>                                            | C <sub>32</sub> H <sub>65</sub> NO <sub>3</sub>                 | 3 |
| CerP 34:1;O2    | Sphingolipids [SP]                           | 616.471 | 616.47116 | 0.018  | [M-H] <sup>-</sup>                                            | C <sub>34</sub> H <sub>68</sub> NO <sub>6</sub> P               | 2 |
| SHexCer 36:1;O3 | Sphingolipids [SP]/Acidic glycosphingolipids | 824.632 | 824.55221 | -3.507 | [M+H] <sup>+</sup> , [M+Na] <sup>+</sup>                      | C <sub>42</sub> H <sub>81</sub> NO <sub>12</sub> S              | 3 |
| SM 40:1         | Sphingolipids [SP]/Phosphosphingolipids      | 787.690 | 787.66547 | -4.322 | [M+H] <sup>+</sup> , [M+Na] <sup>+</sup> , [M+K] <sup>+</sup> | C <sub>45</sub> H <sub>91</sub> N <sub>2</sub> O <sub>6</sub> P | 2 |
| SM 38:0         | Sphingolipids [SP]/Phosphosphingolipids      | 761.595 | 761.65266 | -0.477 | [M+H] <sup>+</sup>                                            | C <sub>43</sub> H <sub>89</sub> N <sub>2</sub> O <sub>6</sub> P | 3 |
| SM 35:1;O2      | Sphingolipids [SP]/Phosphosphingolipids      | 717.615 | 717.59022 | -0.445 | [M+H] <sup>+</sup> , [M+Na] <sup>+</sup>                      | C <sub>40</sub> H <sub>81</sub> N <sub>2</sub> O <sub>6</sub> P | 2 |
| SM 36:2;O2      | Sphingolipids [SP]/Phosphosphingolipids      | 767.571 | 767.54608 | -0.305 | [M+K] <sup>+</sup> , [M+H] <sup>+</sup> , [M+Na] <sup>+</sup> | C <sub>41</sub> H <sub>81</sub> N <sub>2</sub> O <sub>6</sub> P | 2 |
| SM 34:1         | Sphingolipids [SP]/Phosphosphingolipids      | 725.581 | 725.55669 | -0.139 | [M+Na] <sup>+</sup> , [M+K] <sup>+</sup> , [M+H] <sup>+</sup> | C <sub>39</sub> H <sub>79</sub> N <sub>2</sub> O <sub>6</sub> P | 2 |
| SM 37:1;O2      | Sphingolipids [SP]/Phosphosphingolipids      | 745.621 | 745.62176 | -0.024 | [M+H] <sup>+</sup> , [M+Na] <sup>+</sup>                      | C <sub>42</sub> H <sub>85</sub> N <sub>2</sub> O <sub>6</sub> P | 2 |
| SM 38:2;O2      | Sphingolipids [SP]/Phosphosphingolipids      | 795.583 | 795.57769 | 0.059  | [M+K] <sup>+</sup> , [M+H] <sup>+</sup>                       | C <sub>43</sub> H <sub>89</sub> N <sub>2</sub> O <sub>6</sub> P | 2 |
| SM 32:1;O2      | Sphingolipids [SP]/Phosphosphingolipids      | 697.525 | 697.52549 | 0.073  | [M+Na] <sup>+</sup> , [M+H] <sup>+</sup> , [M+K] <sup>+</sup> | C <sub>37</sub> H <sub>75</sub> N <sub>2</sub> O <sub>6</sub> P | 2 |
| SM 34:2         | Sphingolipids [SP]/Phosphosphingolipids      | 723.566 | 723.54119 | 0.121  | [M+Na] <sup>+</sup> , [M+H] <sup>+</sup> , [M+K] <sup>+</sup> | C <sub>39</sub> H <sub>77</sub> N <sub>2</sub> O <sub>6</sub> P | 2 |
| SM 34:0         | Sphingolipids [SP]/Phosphosphingolipids      | 727.547 | 727.57251 | 0.122  | [M+Na] <sup>+</sup> , [M+H] <sup>+</sup> , [M+K] <sup>+</sup> | C <sub>39</sub> H <sub>81</sub> N <sub>2</sub> O <sub>6</sub> P | 2 |
| SM 42:2         | Sphingolipids [SP]/Phosphosphingolipids      | 835.691 | 835.66643 | 0.124  | [M+Na] <sup>+</sup> , [M+H] <sup>+</sup> , [M+K] <sup>+</sup> | C <sub>47</sub> H <sub>93</sub> N <sub>2</sub> O <sub>6</sub> P | 2 |
| SM 33:1;O2      | Sphingolipids [SP]/Phosphosphingolipids      | 727.540 | 727.51511 | 0.164  | [M+K] <sup>+</sup> , [M+H] <sup>+</sup> , [M+Na] <sup>+</sup> | C <sub>38</sub> H <sub>77</sub> N <sub>2</sub> O <sub>6</sub> P | 3 |
| SM 36:1         | Sphingolipids [SP]/Phosphosphingolipids      | 731.601 | 731.60611 | 0.236  | [M+H] <sup>+</sup>                                            | C <sub>41</sub> H <sub>83</sub> N <sub>2</sub> O <sub>6</sub> P | 2 |
| SM 40:2;O2      | Sphingolipids [SP]/Phosphosphingolipids      | 823.685 | 823.60921 | 0.392  | [M+K] <sup>+</sup> , [M+Na] <sup>+</sup> , [M+H] <sup>+</sup> | C <sub>45</sub> H <sub>89</sub> N <sub>2</sub> O <sub>6</sub> P | 2 |
| SM 40:0         | Sphingolipids [SP]/Phosphosphingolipids      | 789.697 | 789.68421 | 0.576  | [M+H] <sup>+</sup>                                            | C <sub>45</sub> H <sub>93</sub> N <sub>2</sub> O <sub>6</sub> P | 2 |
| SM 41:1;O2      | Sphingolipids [SP]/Phosphosphingolipids      | 801.662 | 801.68459 | 0.646  | [M+H] <sup>+</sup> , [M+K] <sup>+</sup> , [M+Na] <sup>+</sup> | C <sub>46</sub> H <sub>93</sub> N <sub>2</sub> O <sub>6</sub> P | 3 |
| SM 41:2;O2      | Sphingolipids [SP]/Phosphosphingolipids      | 837.707 | 837.62514 | 0.649  | [M+H] <sup>+</sup> , [M+K] <sup>+</sup> , [M+Na] <sup>+</sup> | C <sub>46</sub> H <sub>91</sub> N <sub>2</sub> O <sub>6</sub> P | 3 |
| SM 43:2;O2      | Sphingolipids [SP]/Phosphosphingolipids      | 827.679 | 827.70003 | 0.675  | [M+H] <sup>+</sup> , [M+K] <sup>+</sup> , [M+Na] <sup>+</sup> | C <sub>48</sub> H <sub>95</sub> N <sub>2</sub> O <sub>6</sub> P | 2 |
| SM 43:2;O2      | Sphingolipids [SP]/Phosphosphingolipids      | 879.702 | 879.67198 | 0.688  | [M+H] <sup>+</sup> , [M+K] <sup>+</sup> , [M+Na] <sup>+</sup> | C <sub>49</sub> H <sub>97</sub> N <sub>2</sub> O <sub>6</sub> P | 2 |
| SM 42:0;O2      | Sphingolipids [SP]/Phosphosphingolipids      | 855.751 | 855.67221 | 0.697  | [M+H] <sup>+</sup> , [M+K] <sup>+</sup> , [M+Na] <sup>+</sup> | C <sub>47</sub> H <sub>97</sub> N <sub>2</sub> O <sub>6</sub> P | 3 |
| SM 44:1;O2      | Sphingolipids [SP]/Phosphosphingolipids      | 881.662 | 881.68664 | 0.703  | [M+H] <sup>+</sup> , [M+K] <sup>+</sup> , [M+Na] <sup>+</sup> | C <sub>49</sub> H <sub>99</sub> N <sub>2</sub> O <sub>6</sub> P | 2 |
| SM 43:1;O2      | Sphingolipids [SP]/Phosphosphingolipids      | 867.731 | 867.67247 | 0.919  | [M+H] <sup>+</sup> , [M+K] <sup>+</sup> , [M+Na] <sup>+</sup> | C <sub>48</sub> H <sub>97</sub> N <sub>2</sub> O <sub>6</sub> P | 2 |
| SM 42:1         | Sphingolipids [SP]/Phosphosphingolipids      | 837.707 | 837.6823  | 0.931  | [M+Na] <sup>+</sup> , [M+H] <sup>+</sup> , [M+K] <sup>+</sup> | C <sub>47</sub> H <sub>95</sub> N <sub>2</sub> O <sub>6</sub> P | 2 |
| SM 36:0;O2      | Sphingolipids [SP]/Phosphosphingolipids      | 755.531 | 755.60501 | 1.672  | [M+Na] <sup>+</sup> , [M+H] <sup>+</sup> , [M+K] <sup>+</sup> | C <sub>41</sub> H <sub>85</sub> N <sub>2</sub> O <sub>6</sub> P | 2 |
| SM 38:1;O2      | Sphingolipids [SP]/Phosphosphingolipids      | 781.587 | 781.61959 | 0.255  | [M+Na] <sup>+</sup> , [M+H] <sup>+</sup> , [M+K] <sup>+</sup> | C <sub>43</sub> H <sub>87</sub> N <sub>2</sub> O <sub>6</sub> P | 2 |
| SM 41:2;O2      | Sphingolipids [SP]/Phosphosphingolipids      | 821.661 | 821.65063 | -0.462 | [M+Na] <sup>+</sup>                                           | C <sub>46</sub> H <sub>91</sub> N <sub>2</sub> O <sub>6</sub> P | 2 |
| ST 23:4;O6      | Sterol Lipids [ST]                           | 553.332 | 553.29864 | -4.282 | [M+H] <sup>+</sup>                                            | C <sub>29</sub> H <sub>44</sub> O <sub>10</sub>                 | 3 |
| CE 20:4         | Sterol Lipids [ST]                           | 673.444 | 673.58948 | -3.325 | [M+H] <sup>+</sup> , [M+Na] <sup>+</sup>                      | C <sub>47</sub> H <sub>76</sub> O <sub>2</sub>                  | 3 |
| CE 22:5         | Sterol Lipids [ST]                           | 703.561 | 703.55057 | -1.773 | [M+H] <sup>+</sup> , [M+Na] <sup>+</sup>                      | C <sub>43</sub> H <sub>74</sub> O <sub>7</sub>                  | 3 |



|                     |                    |         |           |        |                                                               |                                                  |   |
|---------------------|--------------------|---------|-----------|--------|---------------------------------------------------------------|--------------------------------------------------|---|
| ST 28:1;O;Hex       | Sterol Lipids [ST] | 879.771 | 879.70423 | -0.946 | [M+Na] <sup>+</sup> , [M+K] <sup>+</sup>                      | C <sub>54</sub> H <sub>96</sub> O <sub>7</sub>   | 3 |
| ST 24:2;O4          | Sterol Lipids [ST] | 429.283 | 429.24015 | -0.064 | [M+K] <sup>+</sup> , [M+Na] <sup>+</sup> , [M+H] <sup>+</sup> | C <sub>24</sub> H <sub>38</sub> O <sub>4</sub>   | 3 |
| ST 30:1;O5          | Sterol Lipids [ST] | 493.325 | 491.37318 | 0.156  | [M+H] <sup>+</sup>                                            | C <sub>30</sub> H <sub>50</sub> O <sub>5</sub>   | 3 |
| ST 24:0;O4          | Sterol Lipids [ST] | 395.316 | 395.31566 | 0.176  | [M+H] <sup>+</sup>                                            | C <sub>24</sub> H <sub>42</sub> O <sub>4</sub>   | 3 |
| ST 24:1;O4;GlcA     | Sterol Lipids [ST] | 569.382 | 569.33238 | 0.333  | [M+H] <sup>+</sup>                                            | C <sub>30</sub> H <sub>48</sub> O <sub>10</sub>  | 3 |
| ST 27:3;O           | Sterol Lipids [ST] | 383.373 | 383.33091 | 0.353  | [M+H] <sup>+</sup>                                            | C <sub>27</sub> H <sub>42</sub> O                | 3 |
| ST 30:1;O5          | Sterol Lipids [ST] | 493.401 | 493.38885 | 0.362  | [M+H] <sup>+</sup>                                            | C <sub>30</sub> H <sub>52</sub> O <sub>5</sub>   | 3 |
| ST 28:0;O5          | Sterol Lipids [ST] | 467.265 | 467.20501 | 2.116  | [M+Na] <sup>+</sup> , [M+K] <sup>+</sup>                      | C <sub>25</sub> H <sub>32</sub> O <sub>7</sub>   | 3 |
| Cholesterol sulfate | Sterol Lipids [ST] | 465.305 | 465.30321 | -2.568 | [M-H] <sup>-</sup>                                            | C <sub>27</sub> H <sub>46</sub> O <sub>4</sub> S | 3 |
| ST 21:1;O5          | Sterol Lipids [ST] | 479.292 | 479.28374 | 0.148  | [M-H] <sup>-</sup>                                            | C <sub>27</sub> H <sub>44</sub> O <sub>5</sub> S | 3 |

#### Metabolites

| Compound                        | Biochemical class/Subclass                | RapifleX®<br>m/z | SolariX®<br>m/z | Error<br>(ppm) | Adduct (*)                               | Molecular<br>Formula                                            | MS<br>Identification<br>Level (**) |
|---------------------------------|-------------------------------------------|------------------|-----------------|----------------|------------------------------------------|-----------------------------------------------------------------|------------------------------------|
| Glutamine                       | Amino acids, peptides, and analogues      | 145.067          | 145.06197       | 0.856          | [M-H] <sup>-</sup>                       | C <sub>5</sub> H <sub>10</sub> N <sub>2</sub> O <sub>3</sub>    | 2                                  |
| Glutamate                       | Amino acids, peptides, and analogues      | 146.068          | 146.04597       | 0.059          | [M-H] <sup>-</sup> , [M+Cl] <sup>-</sup> | C <sub>5</sub> H <sub>9</sub> NO <sub>4</sub>                   | 2                                  |
| Histidine                       | Amino acids, peptides, and analogues      | 154.047          | 154.06234       | 0.782          | [M-H] <sup>-</sup>                       | C <sub>6</sub> H <sub>9</sub> N <sub>3</sub> O <sub>2</sub>     | 2                                  |
| Acetylcysteine                  | Amino acids, peptides, and analogues      | 162.023          | 162.02313       | 0.916          | [M-H] <sup>-</sup>                       | C <sub>5</sub> H <sub>9</sub> NO <sub>3</sub> S                 | 3                                  |
| Methionine sulfoxide            | Amino acids, peptides, and analogues      | 164.073          | 164.03881       | 0.398          | [M-H] <sup>-</sup>                       | C <sub>5</sub> H <sub>11</sub> NO <sub>3</sub> S                | 3                                  |
| Arginine                        | Amino acids, peptides, and analogues      | 173.025          | 173.10445       | 0.871          | [M-H] <sup>-</sup>                       | C <sub>6</sub> H <sub>14</sub> N <sub>4</sub> O <sub>2</sub>    | 2                                  |
| Cysteinylglycine                | Amino acids, peptides, and analogues      | 177.046          | 177.03404       | 0.501          | [M-H] <sup>-</sup>                       | C <sub>5</sub> H <sub>10</sub> N <sub>2</sub> O <sub>3</sub> S  | 2                                  |
| Tyrosine                        | Amino acids, peptides, and analogues      | 180.051          | 180.06665       | 0.621          | [M-H] <sup>-</sup> , [M+Cl] <sup>-</sup> | C <sub>9</sub> H <sub>11</sub> NO <sub>3</sub>                  | 2                                  |
| Cystathionine                   | Amino acids, peptides, and analogues      | 221.083          | 221.06079       | 0.431          | [M-H] <sup>-</sup>                       | C <sub>7</sub> H <sub>14</sub> N <sub>2</sub> O <sub>4</sub> S  | 3                                  |
| 3-Nitrotyrosine                 | Amino acids, peptides, and analogues      | 225.059          | 225.05180       | 0.423          | [M-H] <sup>-</sup>                       | C <sub>9</sub> H <sub>10</sub> N <sub>2</sub> O <sub>5</sub>    | 3                                  |
| Carnosine                       | Amino acids, peptides, and analogues      | 225.084          | 225.09952       | 0.567          | [M-H] <sup>-</sup> , [M+Cl] <sup>-</sup> | C <sub>9</sub> H <sub>14</sub> N <sub>4</sub> O <sub>3</sub>    | 2                                  |
| Gamma-Glutamylcysteine          | Amino acids, peptides, and analogues      | 249.063          | 249.05532       | 0.907          | [M-H] <sup>-</sup>                       | C <sub>8</sub> H <sub>14</sub> N <sub>2</sub> O <sub>5</sub> S  | 3                                  |
| Gamma-Glutamyl Glutamine        | Amino acids, peptides, and analogues      | 274.121          | 274.10469       | 0.660          | [M-H] <sup>-</sup>                       | C <sub>10</sub> H <sub>17</sub> N <sub>3</sub> O <sub>6</sub>   | 2                                  |
| Anserine                        | Amino acids, peptides, and analogues      | 239.061          | 239.11501       | 0.193          | [M-H] <sup>-</sup>                       | C <sub>10</sub> H <sub>16</sub> N <sub>4</sub> O <sub>3</sub>   | 2                                  |
| Fructose 6-Phosphate            | Carbohydrates and carbohydrate conjugates | 259.031          | 259.02251       | 0.262          | [M-H] <sup>-</sup>                       | C <sub>6</sub> H <sub>13</sub> O <sub>9</sub> P                 | 2                                  |
| Fructose 1,6-bisPhosphate       | Carbohydrates and carbohydrate conjugates | 339.003          | 338.98883       | 0.168          | [M-H] <sup>-</sup>                       | C <sub>6</sub> H <sub>14</sub> O <sub>12</sub> P <sub>2</sub>   | 2                                  |
| N-Acetyl-L-aspartic acid        | Carboxylic acids and derivatives          | 174.046          | 174.04087       | 0.962          | [M-H] <sup>-</sup>                       | C <sub>6</sub> H <sub>9</sub> NO <sub>5</sub>                   | 2                                  |
| Citric acid                     | Carboxylic acids and derivatives          | 191.028          | 191.01986       | 0.456          | [M-H] <sup>-</sup>                       | C <sub>6</sub> H <sub>8</sub> O <sub>7</sub>                    | 2                                  |
| Aconitic acid                   | Carboxylic acids and derivatives          | 173.011          | 173.00928       | 0.934          | [M-H] <sup>-</sup> , [M+Cl] <sup>-</sup> | C <sub>6</sub> H <sub>6</sub> O <sub>6</sub>                    | 3                                  |
| Pyroglutamic acid               | Carboxylic acids and derivatives          | 128.042          | 128.03542       | 0.953          | [M-H] <sup>-</sup>                       | C <sub>5</sub> H <sub>7</sub> NO <sub>3</sub>                   | 2                                  |
| Aspartate                       | Carboxylic acids and derivatives          | 132.033          | 132.03034       | 0.631          | [M-H] <sup>-</sup> , [M+Cl] <sup>-</sup> | C <sub>4</sub> H <sub>7</sub> NO <sub>4</sub>                   | 2                                  |
| 2-Methylcitric acid             | Carboxylic acids and derivatives          | 205.055          | 205.03546       | 0.976          | [M-H] <sup>-</sup>                       | C <sub>7</sub> H <sub>10</sub> O <sub>7</sub>                   | 3                                  |
| Epsilon-(gamma-Glutamyl)-lysine | Carboxylic acids and derivatives          | 274.117          | 274.14096       | 1.222          | [M-H] <sup>-</sup>                       | C <sub>11</sub> H <sub>21</sub> N <sub>3</sub> O <sub>5</sub>   | 3                                  |
| Glutathione                     | Carboxylic acids and derivatives          | 306.098          | 306.07664       | 0.686          | [M-H] <sup>-</sup>                       | C <sub>10</sub> H <sub>17</sub> N <sub>3</sub> O <sub>6</sub> S | 2                                  |

|                                |                                        |         |           |        |                                                      |                                                                               |   |
|--------------------------------|----------------------------------------|---------|-----------|--------|------------------------------------------------------|-------------------------------------------------------------------------------|---|
| Ascorbic acid                  | Dihydrofurans                          | 175.025 | 211.00146 | 0.656  | <b>[M+Cl]<sup>-</sup></b> , <b>[M-H]<sup>-</sup></b> | C <sub>6</sub> H <sub>8</sub> O <sub>6</sub>                                  | 3 |
| Galactonic acid                | Hydroxy acids and derivatives          | 195.062 | 195.05133 | 0.329  | <b>[M-H]<sup>-</sup></b> , <b>[M+Cl]<sup>-</sup></b> | C <sub>6</sub> H <sub>12</sub> O <sub>7</sub>                                 | 3 |
| Xanthine                       | Imidazopyrimidines                     | 151.021 | 151.02627 | 0.683  | <b>[M-H]<sup>-</sup></b>                             | C <sub>5</sub> H <sub>4</sub> N <sub>4</sub> O <sub>2</sub>                   | 2 |
| N-Acetylserotonin              | Indoles and derivatives                | 217.082 | 217.09831 | 0.271  | <b>[M-H]<sup>-</sup></b>                             | C <sub>12</sub> H <sub>14</sub> N <sub>2</sub> O <sub>2</sub>                 | 2 |
| Tryptophan                     | Indoles and derivatives                | 203.055 | 203.08251 | -0.441 | <b>[M-H]<sup>-</sup></b>                             | C <sub>11</sub> H <sub>12</sub> N <sub>2</sub> O <sub>2</sub>                 | 2 |
| Indoxyl sulfate                | Organic sulfuric acids and derivatives | 212.007 | 212.00241 | 0.509  | <b>[M-H]<sup>-</sup></b>                             | C <sub>8</sub> H <sub>7</sub> NO <sub>4</sub> S                               | 2 |
| N-Acetylneuraminic acid        | Organooxygen compounds                 | 308.098 | 308.09894 | 0.491  | <b>[M-H]<sup>-</sup></b> , <b>[M+Cl]<sup>-</sup></b> | C <sub>11</sub> H <sub>19</sub> NO <sub>9</sub>                               | 2 |
| Hydroxyphenylpyruvic acid      | Phenylpyruvic acid derivatives         | 179.051 | 179.03536 | 0.211  | <b>[M-H]<sup>-</sup></b>                             | C <sub>9</sub> H <sub>8</sub> O <sub>4</sub>                                  | 3 |
| p-Cresol sulfate               | Phenylsulfates                         | 187.021 | 187.00716 | 0.453  | <b>[M-H]<sup>-</sup></b>                             | C <sub>7</sub> H <sub>8</sub> O <sub>4</sub> S                                | 3 |
| Inosine                        | Purine nucleosides                     | 267.091 | 267.07366 | 0.957  | <b>[M-H]<sup>-</sup></b>                             | C <sub>10</sub> H <sub>12</sub> N <sub>4</sub> O <sub>5</sub>                 | 2 |
| Xanthosine                     | Purine nucleosides                     | 283.094 | 283.06854 | 1.154  | <b>[M-H]<sup>-</sup></b>                             | C <sub>10</sub> H <sub>12</sub> N <sub>4</sub> O <sub>6</sub>                 | 2 |
| Guanosine                      | Purine nucleosides                     | 282.069 | 282.08451 | 0.285  | <b>[M-H]<sup>-</sup></b>                             | C <sub>10</sub> H <sub>13</sub> N <sub>5</sub> O <sub>5</sub>                 | 3 |
| Adenosine Triphosphate (ATP)   | Purine nucleotides                     | 506.007 | 505.98910 | 1.241  | <b>[M-H]<sup>-</sup></b>                             | C <sub>10</sub> H <sub>16</sub> N <sub>5</sub> O <sub>13</sub> P <sub>3</sub> | 2 |
| Cyclic AMP (cAMP)              | Purine ribonucleotides                 | 328.077 | 328.04567 | 0.629  | <b>[M-H]<sup>-</sup></b>                             | C <sub>10</sub> H <sub>12</sub> N <sub>5</sub> O <sub>6</sub> P               | 3 |
| Adenosine monophosphate (AMP)  | Purine ribonucleotides                 | 346.061 | 346.05608 | 0.688  | <b>[M-H]<sup>-</sup></b>                             | C <sub>10</sub> H <sub>14</sub> N <sub>5</sub> O <sub>7</sub> P               | 2 |
| Inosinic acid                  | Purine ribonucleotides                 | 347.055 | 347.04013 | -4.801 | <b>[M-H]<sup>-</sup></b>                             | C <sub>10</sub> H <sub>13</sub> N <sub>4</sub> O <sub>8</sub> P               | 3 |
| Uric acid                      | Purines and purine derivatives         | 167.024 | 167.02118 | 0.984  | <b>[M-H]<sup>-</sup></b>                             | C <sub>5</sub> H <sub>4</sub> N <sub>4</sub> O <sub>3</sub>                   | 2 |
| Hypoxanthine                   | Purines and purine derivatives         | 135.043 | 135.03132 | -0.302 | <b>[M-H]<sup>-</sup></b>                             | C <sub>5</sub> H <sub>4</sub> N <sub>4</sub> O                                | 2 |
| Niacinamide                    | Pyridine nucleotides                   | 121.040 | 121.04016 | 0.126  | <b>[M-H]<sup>-</sup></b>                             | C <sub>6</sub> H <sub>6</sub> N <sub>2</sub> O                                | 2 |
| Deoxycytidine                  | Pyrimidine nucleosides                 | 226.084 | 226.08354 | 1.075  | <b>[M-H]<sup>-</sup></b> , <b>[M+Cl]<sup>-</sup></b> | C <sub>9</sub> H <sub>13</sub> N <sub>3</sub> O <sub>4</sub>                  | 3 |
| Deoxyuridine                   | Pyrimidine nucleosides                 | 227.059 | 227.06752 | 1.043  | <b>[M-H]<sup>-</sup></b>                             | C <sub>9</sub> H <sub>12</sub> N <sub>2</sub> O <sub>5</sub>                  | 3 |
| Cytidine                       | Pyrimidine nucleosides                 | 242.062 | 242.07819 | 0.865  | <b>[M-H]<sup>-</sup></b>                             | C <sub>9</sub> H <sub>13</sub> N <sub>3</sub> O <sub>5</sub>                  | 2 |
| Uridine                        | Pyrimidine nucleosides                 | 243.062 | 243.06248 | 1.001  | <b>[M-H]<sup>-</sup></b> , <b>[M+Cl]<sup>-</sup></b> | C <sub>9</sub> H <sub>12</sub> N <sub>2</sub> O <sub>6</sub>                  | 2 |
| 5-Carboxy-2'-deoxyuridine      | Pyrimidine nucleosides                 | 271.059 | 271.05742 | 0.377  | <b>[M-H]<sup>-</sup></b>                             | C <sub>10</sub> H <sub>12</sub> N <sub>2</sub> O <sub>7</sub>                 | 2 |
| Guanosine monophosphate (GMP)  | Pyrimidine nucleosides                 | 362.057 | 362.05092 | 0.747  | <b>[M-H]<sup>-</sup></b>                             | C <sub>10</sub> H <sub>14</sub> N <sub>5</sub> O <sub>8</sub> P               | 2 |
| 5-Methylcytidine               | Pyrimidine nucleosides                 | 256.064 | 256.09419 | 0.756  | <b>[M-H]<sup>-</sup></b>                             | C <sub>10</sub> H <sub>15</sub> N <sub>3</sub> O <sub>5</sub>                 | 3 |
| Uridine 5'-monophosphate (UMP) | Pyrimidine nucleotides                 | 323.051 | 323.02887 | 0.526  | <b>[M-H]<sup>-</sup></b>                             | C <sub>9</sub> H <sub>13</sub> N <sub>2</sub> O <sub>9</sub> P                | 2 |
| 1-hydroxytacrine               | Quinolines and derivatives             | 213.114 | 213.10342 | 0.389  | <b>[M-H]<sup>-</sup></b>                             | C <sub>13</sub> H <sub>14</sub> N <sub>2</sub> O                              | 2 |
| Adenosine diphosphate (ADP)    | Purine ribonucleotides                 | 426.043 | 426.02224 | 0.237  | <b>[M-H]<sup>-</sup></b>                             | C <sub>10</sub> H <sub>14</sub> N <sub>5</sub> O <sub>7</sub> P               | 2 |

(\*) Adduct relating to the *m/z* columns is reported in bold; (\*\*) Metabolites were putatively annotated with MSI level 2 of the Metabolomics Standards Initiative recommendations [25] with accurate mass/spectral similarity/isotopic fine structure. Where MS/MS data were not available, they were tentatively assigned to chemical classes and reported with MSI level 3.

**Table S2.** Additional RP-UHPLC-TIMS-MS to enforce the annotation of the statistical relevant lipids derived from PLS-DA and/or spatial segmentation analysis. Lipids were reported with long name nomenclature if MS/MS spectra contained information about fatty acyl composition, otherwise a short name nomenclature was adopted.

| Short name         | Long name                                    | m/z     | Error (ppm) | Adduct (*)                                                    | CCS (Å²)        | Molecular Formula                                               |
|--------------------|----------------------------------------------|---------|-------------|---------------------------------------------------------------|-----------------|-----------------------------------------------------------------|
| Cer 42:2;O         | Cer 18:1;O/24:1                              | 632.629 | -1.046      | [M+H] <sup>+</sup> , [M+Na] <sup>+</sup>                      | 281.5           | C <sub>42</sub> H <sub>81</sub> NO <sub>2</sub>                 |
| DG O-36:4          | DG O-36:4                                    | 603.534 | -1.032      | [M+H] <sup>+</sup> , [M+Na] <sup>+</sup>                      | 261.5           | C <sub>39</sub> H <sub>70</sub> O <sub>4</sub>                  |
| LPC 16:0           | LPC 16:0-SN1                                 | 496.339 | -0.785      | [M+H] <sup>+</sup> , [M+Na] <sup>+</sup> , [M+K] <sup>+</sup> | 232.7           | C <sub>24</sub> H <sub>50</sub> NO <sub>7</sub> P               |
| PC 30:0            | PC 15:0_15:0                                 | 744.495 | 0.671       | [M+K] <sup>+</sup> , [M+Na] <sup>+</sup> , [M+H] <sup>+</sup> | 281.8           | C <sub>38</sub> H <sub>76</sub> NO <sub>8</sub> P               |
| PC 32:0            | PC 16:0_16:0                                 | 772.526 | 1.293       | [M+K] <sup>+</sup> , M+Na <sup>+</sup> , [M+H] <sup>+</sup>   | 287.1           | C <sub>40</sub> H <sub>80</sub> NO <sub>8</sub> P               |
| PC 32:1            | PC 16:0_16:1                                 | 770.511 | 1.297       | [M+K] <sup>+</sup> , [M+Na] <sup>+</sup> , [M+K] <sup>+</sup> | 284.2           | C <sub>40</sub> H <sub>78</sub> NO <sub>8</sub> P               |
| PC 34:1            | PC 16:0_18:1                                 | 798.542 | 1.252       | [M+K] <sup>+</sup> , [M+Na] <sup>+</sup> , [M+H] <sup>+</sup> | 290.3           | C <sub>42</sub> H <sub>82</sub> NO <sub>8</sub> P               |
| PC 34:3            | PC 16:0_18:3 or PC 16:1_18:2                 | 756.554 | 0.885       | [M+H] <sup>+</sup>                                            | 283.4/ 284      | C <sub>42</sub> H <sub>78</sub> NO <sub>8</sub> P               |
| PC 32:2 or PE 35:2 | PC 16:1_16:1 or PE 9:0_26:2                  | 730.540 | 1.846       | [M+H] <sup>+</sup>                                            | 280.7/277.8     | C <sub>40</sub> H <sub>76</sub> NO <sub>8</sub> P               |
| PC 33:2 or PE 36:2 | PC 17:0_16:2 or PE 18:0_18:2 or PE 18:1_18:1 | 744.554 | 0.623       | [M+H] <sup>+</sup> , [M+Na] <sup>+</sup>                      | 283.6/281.6/281 | C <sub>41</sub> H <sub>78</sub> NO <sub>8</sub> P               |
| PC 34:2            | PC 17:1_17:1                                 | 758.563 | 1.318       | [M+K] <sup>+</sup> , [M+Na] <sup>+</sup> , [M+H] <sup>+</sup> | 286.8           | C <sub>42</sub> H <sub>80</sub> NO <sub>8</sub> P               |
| PC 38:3            | PC 18:0_20:3 or PC 20:1_18:2                 | 812.618 | 1.761       | [M+H] <sup>+</sup> , [M+K] <sup>+</sup> , [M+Na] <sup>+</sup> | 297.3/ 296.9    | C <sub>46</sub> H <sub>86</sub> NO <sub>8</sub> P               |
| PC 21:1            | -                                            | 578.412 | 0.064       | [M+H] <sup>+</sup> , [M+Na] <sup>+</sup> , [M+K] <sup>+</sup> | -               | C <sub>29</sub> H <sub>56</sub> NO <sub>8</sub> P               |
| PC 25:1;O          | -                                            | 650.459 | 0.183       | [M+H] <sup>+</sup> , [M+Na] <sup>+</sup> , [M+K] <sup>+</sup> | -               | C <sub>33</sub> H <sub>64</sub> NO <sub>9</sub> P               |
| PC O-32:2          | -                                            | 551.511 | 0.007       | [M+H] <sup>+</sup> , [M+Na] <sup>+</sup>                      | -               | C <sub>35</sub> H <sub>66</sub> O <sub>4</sub>                  |
| PC O-42:6          | -                                            | 870.655 | 0.292       | [M+Na] <sup>+</sup> , [M+K] <sup>+</sup> , [M+H] <sup>+</sup> | -               | C <sub>50</sub> H <sub>90</sub> NO <sub>7</sub> P               |
| PC O-44:5          | PC O-44:5                                    | 900.683 | 1.109       | [M+Na] <sup>+</sup> , [M+K] <sup>+</sup>                      | 312.6           | C <sub>52</sub> H <sub>96</sub> NO <sub>7</sub> P               |
| PE 34:0            | PE 18:0_16:0                                 | 718.554 | 0.799       | [M-H] <sup>-</sup>                                            | 285.1           | C <sub>39</sub> H <sub>78</sub> NO <sub>8</sub> P               |
| PE 36:3            | PE 12:0_24:3 or PE 18:1_18:2                 | 742.539 | 1.289       | [M+H] <sup>+</sup>                                            | 279.2/ 277.6    | C <sub>41</sub> H <sub>76</sub> NO <sub>8</sub> P               |
| PE 40:2            | PE 18:1_22:1                                 | 800.617 | 1.249       | [M+H] <sup>+</sup>                                            | 295.1           | C <sub>45</sub> H <sub>86</sub> NO <sub>8</sub> P               |
| PE 42:7            | -                                            | 818.479 | -2.834      | [M+H] <sup>+</sup>                                            | -               | C <sub>47</sub> H <sub>80</sub> NO <sub>8</sub> P               |
| PE O-38:6          | PE O-16:1_22:5                               | 750.544 | 0.619       | [M+H] <sup>+</sup> , [M+Na] <sup>+</sup>                      | 279.3           | C <sub>43</sub> H <sub>76</sub> NO <sub>7</sub> P               |
| PS O-30:2          | -                                            | 712.461 | 0.132       | [M+Na] <sup>+</sup> , [M+K] <sup>+</sup> , [M+H] <sup>+</sup> | -               | C <sub>36</sub> H <sub>68</sub> NO <sub>9</sub> P               |
| PS 36:1            | -                                            | 524.334 | 1.102       | [M-H] <sup>-</sup>                                            | -               | C <sub>24</sub> H <sub>48</sub> NO <sub>9</sub> P               |
| SM 44:1;O2         | SM 18:1;2O/26:0                              | 881.687 | 0.589       | [M+K] <sup>+</sup> , [M+Na] <sup>+</sup> , [M+H] <sup>+</sup> | 313.8           | C <sub>49</sub> H <sub>99</sub> N <sub>2</sub> O <sub>6</sub> P |
| SM 41:2;O2         | SM 18:2;2O/23:0                              | 821.651 | 0.453       | [M+Na] <sup>+</sup>                                           | 303.4           | C <sub>46</sub> H <sub>91</sub> N <sub>2</sub> O <sub>6</sub> P |
| SM 43:2;O2         | SM 18:2;2O/25:0                              | 827.693 | 0.806       | [M+H] <sup>+</sup> , [M+K] <sup>+</sup> , [M+Na] <sup>+</sup> | 309.4           | C <sub>48</sub> H <sub>95</sub> N <sub>2</sub> O <sub>6</sub> P |
| SM 36:1;O2         | SM 18:1;2O/18:0                              | 731.598 | -0.135      | [M+H] <sup>+</sup>                                            | 292.5           | C <sub>41</sub> H <sub>83</sub> N <sub>2</sub> O <sub>6</sub> P |
| SM 38:1;O2         | SM 18:1;2O/20:0                              | 781.618 | 0.022       | [M+Na] <sup>+</sup> , [M+K] <sup>+</sup> , [M+H] <sup>+</sup> | 297.8           | C <sub>43</sub> H <sub>87</sub> N <sub>2</sub> O <sub>6</sub> P |
| SM 34:2;O2         | SM 16:2;2O/18:1                              | 723.541 | -0.312      | [M+Na] <sup>+</sup> , [M+H] <sup>+</sup> , [M+K] <sup>+</sup> | 283             | C <sub>39</sub> H <sub>77</sub> N <sub>2</sub> O <sub>6</sub> P |
| SM 38:0;O2         | -                                            | 761.595 | -0.477      | [M+H] <sup>+</sup>                                            | -               | C <sub>43</sub> H <sub>89</sub> N <sub>2</sub> O <sub>6</sub> P |
| TG 54:4            | TG 18:1_18:1_18:2                            | 883.775 | 0.785       | [M+H] <sup>+</sup>                                            | 324.6           | C <sub>57</sub> H <sub>102</sub> O <sub>6</sub>                 |
| TG 53:2            | TG 17:0_18:1_18:1                            | 895.774 | 0.116       | [M+Na] <sup>+</sup> , [M+K] <sup>+</sup>                      | 324.9           | C <sub>56</sub> H <sub>104</sub> O <sub>6</sub>                 |
| TG 52:2            | TG 16:0_18:1_18:1                            | 881.757 | 0.259       | [M+Na] <sup>+</sup> , [M+K] <sup>+</sup>                      | 322.5           | C <sub>55</sub> H <sub>102</sub> O <sub>6</sub>                 |

|         |                   |         |       |                                                                     |       |                                                 |
|---------|-------------------|---------|-------|---------------------------------------------------------------------|-------|-------------------------------------------------|
| TG 54:3 | TG 18:1_18:1_18:1 | 907.773 | 0.561 | <b>[M+Na]<sup>+</sup></b> , [M+K] <sup>+</sup> , [M+H] <sup>+</sup> | 326.8 | C <sub>57</sub> H <sub>104</sub> O <sub>6</sub> |
| TG 56:5 | TG 18:1_18:1_20:3 | 909.792 | 1.163 | <b>[M+H]<sup>+</sup></b> , [M+Na] <sup>+</sup> , [M+K] <sup>+</sup> | 329.4 | C <sub>59</sub> H <sub>104</sub> O <sub>6</sub> |
| TG 58:9 | TG 18:1_18:2_22:6 | 929.759 | 0.384 | <b>[M+H]<sup>+</sup></b> , [M+Na] <sup>+</sup> , [M+K] <sup>+</sup> | 328.6 | C <sub>61</sub> H <sub>100</sub> O <sub>6</sub> |

(\*) Adduct relating to the  $m/z$  columns is reported in bold.

**Table S3.** Additional HILIC-HRMS/MS to enforce the annotation of the statistical relevant non-polar and polar metabolites derived from PLS-DA and/or spatial segmentation analysis.

| Compound name                 | $m/z$   | Error (ppm) | Adduct (*)               | MS/MS                               | Molecular Formula                                                             |
|-------------------------------|---------|-------------|--------------------------|-------------------------------------|-------------------------------------------------------------------------------|
| CAR 16:0                      | 400.341 | 0.209       | <b>[M+H]<sup>+</sup></b> | 341.2693, 85.0286, 60.0815          | C <sub>23</sub> H <sub>45</sub> NO <sub>4</sub>                               |
| LPC 15:0                      | 480.309 | 0.119       | <b>[M-H]<sup>-</sup></b> | 256.2335, 242.0789, 167.9525        | C <sub>23</sub> H <sub>48</sub> NO <sub>7</sub> P                             |
| FA 18:2                       | 279.233 | 0.429       | <b>[M-H]<sup>-</sup></b> | 261.2238, 96.9598                   | C <sub>18</sub> H <sub>32</sub> O <sub>2</sub>                                |
| FA 20:4                       | 303.233 | 0.519       | <b>[M-H]<sup>-</sup></b> | 259.2423, 231.2108, 285.2182        | C <sub>20</sub> H <sub>32</sub> O <sub>2</sub>                                |
| FA 22:6                       | 327.233 | 0.859       | <b>[M-H]<sup>-</sup></b> | 283.2436, 229.1972, 59.0128         | C <sub>22</sub> H <sub>32</sub> O <sub>2</sub>                                |
| FA 18:0                       | 283.263 | 0.519       | <b>[M-H]<sup>-</sup></b> | 201.2264                            | C <sub>18</sub> H <sub>36</sub> O <sub>2</sub>                                |
| Glutamine                     | 145.061 | 0.479       | <b>[M-H]<sup>-</sup></b> | 127.0497,                           | C <sub>5</sub> H <sub>10</sub> N <sub>2</sub> O <sub>3</sub>                  |
| Glutamate                     | 146.045 | 0.169       | <b>[M-H]<sup>-</sup></b> | 128.0345, 102.0545                  | C <sub>5</sub> H <sub>9</sub> NO <sub>4</sub>                                 |
| Adenosine diphosphate (ADP)   | 426.021 | 0.709       | <b>[M-H]<sup>-</sup></b> | 346.0567, 134.0464, 96.968          | C <sub>10</sub> H <sub>15</sub> N <sub>5</sub> O <sub>10</sub> P <sub>2</sub> |
| Adenosine monophosphate (AMP) | 346.055 | 0.129       | <b>[M-H]<sup>-</sup></b> | 134.047, 96.968, 79.9578            | C <sub>10</sub> H <sub>14</sub> N <sub>5</sub> O <sub>7</sub> P               |
| Uridine monophosphate (UMP)   | 323.027 | 1.089       | <b>[M-H]<sup>-</sup></b> | 211.0011, 111.0208, 96.968, 79.9578 | C <sub>9</sub> H <sub>13</sub> N <sub>2</sub> O <sub>9</sub> P                |
| Guanosine monophosphate (GMP) | 362.050 | 0.747       | <b>[M-H]<sup>-</sup></b> | 150.0412, 108.0201 96.968           | C <sub>10</sub> H <sub>14</sub> N <sub>5</sub> O <sub>8</sub> P               |
| Xanthine                      | 151.025 | 0.749       | <b>[M-H]<sup>-</sup></b> | 108.0189, 126.0269                  | C <sub>5</sub> H <sub>4</sub> N <sub>4</sub> O <sub>2</sub>                   |
| Hypoxanthine                  | 135.030 | 1.129       | <b>[M-H]<sup>-</sup></b> | 117.0318, 92.0239, 65.0139          | C <sub>5</sub> H <sub>4</sub> N <sub>4</sub> O                                |
| Cytidine                      | 242.077 | 0.379       | <b>[M-H]<sup>-</sup></b> | 110.0359                            | C <sub>9</sub> H <sub>13</sub> N <sub>3</sub> O <sub>5</sub>                  |
| Aspartate                     | 132.029 | 1.219       | <b>[M-H]<sup>-</sup></b> | 115.0024, 88.04, 74.0125            | C <sub>4</sub> H <sub>7</sub> NO <sub>4</sub>                                 |

(\*) Adduct relating to the  $m/z$  columns is reported in bold.
